# Supplementary material for: Compare the Effect of Inhaled Corticosteroids and Systemic Corticosteroids on Sputum Microbiome of AECOPD
Source: Front Med (Lausanne). 2021 Feb 26;8:637246. doi: 10.3389/fmed.2021.637246 (PMC7952309; doi:10.3389/fmed.2021.637246)
Supplement: Supplementary file 2 [file Table_2.XLSX]

## Sheet: allsample
# Constructed from biom file
#OTU ID	A1a	A1b	A1c	A2a	A2b	A2c	A3a	A3b	A3c	A4a	A4b	A4c	A5a	A5b	A5c	A6a	A6b	A7a	A7b	A7c	A8a	A8b	A8c	A9a	A9b	A9c	A10a	A10b	A10c	A11a	A11b	A11c	A12a	A12b	A12c	A13a	A13b	A13c	A14a	A14b	A15a	A15b	A15c	A16a	A16b	A16c	A17a	A17b	A17c
OTU1	6351	2087	5672	11261	24062	13	5671	8730	8	3605	11809	14737	30841	4056	146	270	6502	2691	15794	626	15725	28840	11835	36697	21101	24714	21923	18741	12	11070	6900	7537	34	19916	5	70904	7	5	282	8604	1422	39738	2633	322	349	6276	684	6353	9793
OTU10	0	1	1	26	3	3	0	1	0	11	0	13	36	0	1	0	0	3	0	0	7057	7	7	128	184	162	1	0	3	8	2	0	1	0	0	8	3	2	60	0	3	3	0	4	1	0	7	1	0
OTU100	7	1	0	2	3	3	1	0	1	9	5	0	16	0	0	1	0	5	28	0	9	0	4	3	4	4	2	0	0	6	0	2	7	0	0	12	5	2	96	2	3	3	1	7	1	0	0	1	0
OTU101	0	1	0	62	18	1	57	107	0	0	0	0	0	97	1	2	0	0	32	0	57	19	6	1	3	1	35	11	0	5	9	18	0	7	0	0	0	0	0	18	6	0	381	0	0	0	19	1	0
OTU10133	0	0	0	1	1	0	0	0	0	0	0	0	0	0	0	0	0	0	1	1	1	10	3	0	0	0	0	0	0	0	0	0	0	0	0	0	0	0	0	0	0	0	1	0	0	0	0	0	0
OTU10141	3	0	1	37	0	0	0	0	0	720	0	0	12	0	0	0	0	0	0	0	23	0	5	0	14	3	0	0	0	0	0	0	82	0	0	2	0	0	33	0	0	0	0	1	0	0	0	0	0
OTU10158	680	1170	948	112	213	0	2249	1106	0	9	20	25	4	0	0	1	0	337	1045	0	0	6	1	1215	707	371	0	7	0	430	724	1337	6	18	0	0	3	0	24	5	146	1	0	2	1	0	23	1	0
OTU102	0	0	0	21	0	0	0	0	0	0	0	0	0	0	0	0	0	0	2	0	365	0	0	0	0	0	0	0	0	10	2	0	0	0	0	0	0	0	1	0	280	27	0	0	0	0	4	0	0
OTU103	1	0	0	0	5	0	0	0	0	128	188	0	1	0	0	0	0	1	0	0	0	1	1	1	1	5	2	0	0	0	0	5	8	1	0	0	9	0	2629	0	2	0	0	0	0	0	1	0	0
OTU10376	0	0	0	1	0	0	0	0	0	4	0	0	0	0	0	0	0	0	241	0	23	0	1	0	0	0	0	0	0	0	0	0	0	0	0	0	0	0	0	0	0	17	0	0	0	0	0	0	0
OTU104	0	1	0	12	0	0	0	1	0	11462	0	1	67	0	1	0	0	0	0	0	12	0	139	0	11	0	0	0	1	0	6	5	2283	0	0	0	0	0	35	1	4	0	0	0	0	0	0	0	0
OTU105	0	0	4	237	12	0	4	40	0	0	1	38	0	18	0	0	0	1	11	1	154	503	8	0	0	0	28	1	0	1	18	6	1	0	0	0	0	0	1	1	57	0	5	0	0	0	174	0	0
OTU10598	0	0	0	0	0	0	0	0	0	0	0	0	0	0	0	0	0	0	0	0	42	0	0	1	0	1	0	0	0	0	0	0	0	0	0	0	0	0	0	0	0	0	0	0	0	0	0	0	0
OTU106	51	1	19	557	66	6	0	0	0	1039	35	50	104	0	1	0	0	1	0	0	101	7	9	8	103	17	5	0	0	18	9	11	159	0	0	18	10	0	402	1	3	6	0	4	3	0	0	0	0
OTU10625	0	0	0	0	0	0	0	0	0	0	0	0	0	0	0	0	0	0	0	0	0	0	0	0	1	2	0	0	0	0	0	0	0	0	0	0	0	0	0	0	0	0	0	0	0	0	0	0	0
OTU107	0	0	2	206	2	0	22	33	0	0	0	0	0	82	0	2	2	1	0	4	11	1	1	5	0	0	2	2	0	4	6	0	2	1	0	0	0	0	0	4	69	1	19	2	0	0	3887	1	0
OTU108	0	0	0	0	0	0	16	11	0	0	0	0	0	36	2	0	0	0	0	2	114	1	8	0	0	3	133	0	0	0	1	2	6	0	0	0	0	0	0	0	27	0	14	2448	2145	1	0	0	0
OTU109	0	0	2	31	0	0	0	0	0	0	1	0	0	0	2	2	11	0	0	2	186	0	0	0	0	0	0	0	0	0	0	0	0	0	0	0	0	0	0	0	0	0	0	0	0	0	5	0	0
OTU11	4173	59	1478	29	1	11531	3	1	2368	113	3	1	1735	182	4596	2530	5103	417	179	9086	30	4	39	1	2	5	201	0	1450	8170	18700	6086	6660	0	614	600	11150	7680	17	1	273	2	314	4492	3944	2382	6	1668	1352
OTU110	2	0	0	39	1	3	0	0	9	0	3	0	19	2	14	9	1	25	0	8	3	0	0	5	4	23	1	0	0	0	0	2	1	0	1	11425	0	3	21	34	8	0	1	0	0	7	0	1	4
OTU111	0	0	2	178	219	0	1	2	0	0	0	0	0	0	0	0	0	0	0	0	13	24	2	0	0	0	0	0	0	156	1134	5713	0	1	0	0	0	0	0	0	0	0	0	0	0	0	0	0	0
OTU112	3	2	28	30	1	9	1	1	478	10	9	3	19	4	15	12	1	22	0	12	8	1	8	6	19	1	6	0	0	86	19	43	10	1	0	10	2	0	188	0	33	70	0	30	15	0	37	0	1
OTU1125	6	0	4	173	13	0	0	5	0	12	30	74	190	0	0	0	0	3	2	0	25	4	25	3	10	26	6	0	0	43	36	12	27	0	0	14	15	0	10	0	9	7	0	7	2	0	0	0	0
OTU113	0	0	0	22	18	279	0	6	86	0	0	0	0	28	11	16	8	0	0	20	1	1	0	1	5	9	1	0	2	40	2	0	4	1	9	0	0	4	0	2	2	0	3	0	0	7	616	1	2
OTU114	0	0	0	30	0	0	0	0	0	0	0	0	0	0	0	0	0	4	15	0	0	0	0	0	0	0	0	0	0	15	0	0	0	0	0	0	1	0	0	0	0	0	0	0	0	0	0	0	0
OTU115	1	0	0	13	0	0	0	1	0	3	7	4	0	0	0	1	1	0	0	0	1	0	0	0	24	0	0	0	0	0	0	0	0	0	0	0	3	0	19	0	0	0	0	0	0	0	0	0	0
OTU116	1635	3142	2202	393	978	1	2246	3306	0	47	7132	8076	285	228	2385	1547	1548	12465	1934	1778	1400	2050	2456	1799	1036	494	1017	341	0	300	590	897	3	923	1	0	1	0	9	373	254	0	443	0	0	3202	2	1653	1909
OTU117	0	0	2	20	0	0	9	26	0	0	0	0	0	0	5	7	4	0	0	1	7	2	0	0	0	1	0	1	0	0	42	0	0	0	0	5	0	0	0	1	5	0	0	2	0	14	170	0	0
OTU118	1	0	1	39	5	0	0	0	0	4	13	12	43	0	0	0	0	1	0	0	29	1	1	0	104	0	0	0	1	8	0	1	7	0	0	0	7	0	161	0	3	1	0	1	1	0	0	0	0
OTU119	6	0	0	0	0	0	0	0	0	4	0	0	2	0	0	0	0	1	0	0	0	0	0	1	10	5	0	1	0	1	0	2	0	1	0	0	0	0	1	1	2	0	0	0	0	0	0	0	1
OTU12	5908	24060	7200	160	7529	0	51	453	1	26	23	7	51	8427	4	1	1	3166	9393	2	2084	1483	2741	125	1066	131	9897	6178	1	312	278	351	9	4562	1	53	2	0	23	2793	70	5175	5685	2	1	1	0	0	1
OTU120	0	0	1	0	1	419	1	43	146	0	0	0	0	1	169	287	214	0	0	128	13	180	41	0	0	0	0	50	1	0	1	0	17	17	12	0	0	10	0	91	4	0	0	5	4	50	1	19	15
OTU121	112	45	151	64	0	0	169	21	0	2	0	0	4	13	3	5	8	324	13	7	49	7	1	62	7	0	0	9	0	38	112	427	2	10	0	46	5	1	1	96	101	1	24	2	2	56	62	25	27
OTU122	0	0	0	53	95	0	0	3	0	0	0	0	0	9	0	0	0	0	68	0	248	31	16	4	0	0	3	0	0	5	17	1	0	0	0	0	0	0	0	1	2	0	37	0	0	0	6	0	1
OTU123	2	0	2	4	1	0	0	7	1	0	0	0	0	5	407	550	382	0	0	331	0	0	0	0	0	0	0	4	0	2	1	3	2	1	0	0	2	0	0	3	0	0	0	0	0	151	1	51	28
OTU124	0	0	0	51	0	0	2228	403	0	1	8	0	0	0	0	0	1	0	0	0	7	2	1	0	27	3	0	0	0	7	6	2	2	1	0	1	0	0	28	2	39	14	0	20	15	0	1	0	0
OTU1242	10	2	9	0	13	3	7	3	0	0	6	9	1	6	0	0	0	18	4	0	0	10	0	5	8	2	12	12	16	0	4	3	0	7	7	0	0	0	0	8	10	21	5	20	24	4	0	2	0
OTU125	1	0	5	223	595	0	0	0	0	4	0	0	0	0	0	0	0	0	4	0	16	5	0	0	0	1	0	0	0	0	0	0	2	0	0	0	0	0	1	0	100	1	0	0	0	0	13	0	0
OTU126	0	0	0	0	0	0	0	0	0	2	0	0	0	0	0	0	1	0	0	0	0	0	0	0	0	2	0	0	0	0	0	0	0	0	0	0	1	0	0	0	0	0	0	0	0	0	0	0	0
OTU127	197	118	364	0	0	0	151	1243	0	0	159	190	0	235	0	0	0	32	217	0	4	0	0	1175	117	45	260	6	0	12	31	139	2	39	0	0	0	0	0	110	0	0	250	0	0	0	0	0	0
OTU1270	19	16	37	2	7	0	43	93	0	1	6	6	1	15	107	82	44	33	55	76	42	75	77	1	5	3	54	16	0	4	6	3	1	18	0	0	4	0	1	5	30	15	16	16	4	133	0	106	138
OTU128	5	0	0	68	7	85	0	0	5	23	1	27	10	13	8	8	16	3	2	5	7	5	1	5	2	0	11	0	0	15	3	0	23	0	0	8	128	1	91	1	18	29	0	8	3	0	0	0	2
OTU129	0	0	0	0	11	0	5	34	0	0	0	0	0	5	831	970	90	0	5	520	11	4	0	0	0	0	18	1	1	96	18	0	95	1	0	0	1	0	0	13	0	0	0	0	0	253	9	50	19
OTU13	5	0	2	45	3	17	0	0	10	6	17	4	7	0	3	1	0	1	2	7	25	0	18	5	2	9	5	11	18	6	11	7	24060	0	10	12	7	6	499	1	5	16	17	6	7	0	1	3	9
OTU130	0	0	0	0	4	0	0	0	0	520	0	0	0	0	0	0	0	0	0	0	2	0	7	0	3	0	0	0	0	0	0	0	76	0	0	0	0	0	13	0	0	0	0	0	0	0	1	0	0
OTU131	1	1	1	6	0	8	78	42	3	14	31	215	0	127	3	1	5	0	0	3	41	11	0	45	92	52	349	24	1	15	27	4	22	18	0	0	0	0	0	39	46	2	61	0	2	19	1790	0	0
OTU132	0	0	14	997	199	0	3	15	0	4	30	0	0	0	0	0	0	0	29	0	24	29	2	0	0	0	11	23	0	3	44	46	3	33	0	0	0	0	0	338	0	0	0	0	0	0	1	0	0
OTU133	18	0	16	991	83	0	2	3	0	98	126	250	855	0	0	0	0	7	1	0	84	6	106	60	39	144	15	1	0	223	76	39	111	0	0	51	105	0	109	0	25	42	0	45	16	0	0	0	0
OTU134	0	0	1	229	75	0	14	77	0	0	0	0	0	4	30	7	2	0	0	12	28	56	10	1	1	0	26	5	0	1	0	4	6	1	0	0	0	0	0	25	0	0	0	11	18	1	113	4	0
OTU1341	108	18	67	13	28	0	5	3	0	0	66	125	67	0	0	0	0	114	6	0	37	29	7	39	5	7	22	0	0	8	12	59	0	0	0	9	0	0	2	1	113	72	0	457	490	0	13	0	0
OTU135	0	0	0	0	0	0	0	0	0	0	0	0	0	0	0	0	0	0	0	0	0	0	0	0	0	0	0	0	0	0	0	0	0	0	0	0	0	0	0	0	0	0	0	0	0	0	0	0	0
OTU136	0	0	0	0	0	0	0	0	0	1037	0	7	0	0	0	0	0	0	0	0	0	0	9	0	2	0	0	0	0	0	0	0	79	0	0	1	0	0	0	0	0	0	0	0	0	0	0	0	0
OTU137	0	1	0	0	0	0	0	0	0	0	0	0	0	0	0	0	0	0	995	0	43	0	0	0	0	0	0	4	0	0	0	0	0	6	0	0	0	0	0	20	0	0	0	0	0	0	9	0	0
OTU138	8	1	3	80	1	0	2	12	0	0	0	0	0	45	39	41	19	1	12	39	30	2	1	2	3	0	12	5	0	2	2	0	0	20	0	0	0	0	1	224	118	2	6	6	2	12	429	9	1
OTU139	7	2	63	2439	17	0	147	49	0	0	0	0	0	0	0	0	2	0	0	1	29	28	0	4	0	1	65	4	0	2	1	0	0	7	0	0	0	0	0	4	1	0	0	0	0	0	14	0	0
OTU14	0	0	1	13	0	5	0	2	4	11	0	3	2	18357	2	3	3	3	6990	3	12	18980	353	0	0	0	0	0	2	8	0	0	57	0	2	6	2	0	3	0	137	2	20396	10	4	3	6	0	3
OTU140	0	0	0	0	0	0	0	0	0	0	0	0	0	0	0	0	0	0	0	0	0	0	0	0	0	0	0	0	0	0	0	0	0	0	0	1	0	0	0	0	0	0	0	0	1	0	0	0	0
OTU141	0	0	0	0	20	0	0	0	1	21	102	96	0	49	0	0	0	0	45	0	6	12	4	0	0	2	90	51	0	16	24	31	0	43	0	6	0	0	0	59	69	324	18	0	0	0	2	0	0
OTU142	0	0	0	0	0	0	0	0	0	0	0	0	0	0	0	0	0	0	0	0	0	0	0	0	0	0	0	0	0	0	0	0	0	0	0	0	0	1	0	0	0	0	0	0	0	0	0	0	0
OTU143	0	0	1	19	8	0	0	0	0	0	30	85	0	82	0	2	0	0	0	0	40	63	32	66	10	5	16	17	0	3	26	33	0	24	0	375	0	0	11	53	145	9	25	0	0	0	114	0	0
OTU144	0	0	0	0	0	0	0	0	0	0	0	0	0	0	0	0	0	0	0	0	0	0	0	0	0	0	0	0	0	0	0	0	0	0	0	0	0	0	8	0	0	0	0	0	0	0	0	0	0
OTU145	0	0	1	12	0	5	26	13	3	5	0	0	0	16	7	9	4	0	66	3	170	8	11	0	0	0	20	28	0	2	0	0	8	26	0	0	0	0	0	80	18	0	2	2	0	2	132	0	0
OTU146	1	0	0	40	0	0	0	0	0	0	2	0	35	0	0	0	0	0	0	0	1	0	4	0	3	0	0	0	0	0	0	0	1	0	0	6	0	1	0	0	0	0	0	0	0	0	0	0	0
OTU147	0	0	0	17	25	0	0	0	0	0	0	0	0	1668	1	0	0	0	10	0	229	5	40	0	0	0	6	4	0	0	0	6	0	5	0	0	0	0	0	40	11	10	217	0	0	0	16	0	0
OTU148	4	0	2	0	7	1	1	15	0	0	0	0	0	0	0	0	2	0	0	0	0	0	0	9	2	3	0	0	0	31	12	17	1	0	0	677	182	0	1	0	54	5	0	2	8	2	3	0	0
OTU149	0	0	4	142	55	0	0	0	1	0	0	0	0	1	0	0	1	0	0	0	0	0	0	0	0	0	0	0	0	0	0	0	0	0	0	0	0	0	0	0	0	0	0	0	0	0	0	0	0
OTU1491	0	0	36	0	4	0	11	17	0	0	0	0	1	35	0	0	0	7	28	0	0	5	0	3	1	0	0	0	0	3	0	3	0	0	0	0	0	0	0	2	0	0	32	0	0	0	1	0	0
OTU15	3689	3928	3825	844	46	1	9039	11555	0	10	1701	328	183	234	2868	2799	985	5222	615	3927	2304	916	405	1588	545	51	1	332	0	456	764	1503	0	583	0	46	203	3	6	1769	510	286	169	487	375	1504	96	1399	1051
OTU150	18	1	3	15	1	291	72	314	76	0	0	0	6	6	47	94	89	0	0	62	4	37	1	0	1	13	0	1	16	0	3	2	4	0	32	1	3	22	1	1	5	0	0	0	0	35	257	14	5
OTU151	0	0	0	39	2	0	9	55	0	0	0	0	0	0	0	0	0	0	0	0	0	0	0	0	9	3	0	0	0	5	5	3	1	0	0	0	0	0	4	0	0	0	0	0	0	0	37	0	0
OTU1514	0	0	0	0	4	6	0	0	2	0	9	2	3	0	0	1	0	2	1	0	2	0	0	0	0	0	1	0	0	1	3	0	0	0	0	0	16	0	23	3	3	0	0	0	4	1	0	0	0
OTU152	0	0	0	0	0	0	1	0	0	0	1	0	0	0	0	0	0	0	122	0	65	0	0	0	0	6	1	22	0	4	0	0	0	28	0	0	0	0	0	122	0	0	0	0	0	0	0	0	0
OTU153	1	0	1	24	0	1	0	0	2	2	5	0	5	0	0	1	1	51	0	0	1	22	7	5	1	7	6	0	0	0	0	1	4	0	0	1216	0	0	21	1	14	4	0	50	44	0	0	0	0
OTU1530	0	1	4	59	0	1	8	3	0	0	0	0	2	0	0	0	0	0	0	0	3	1	4	0	0	0	0	0	0	0	2	0	8	0	0	0	0	0	0	1	4	0	0	2	4	0	38	0	0
OTU154	0	0	0	62	1	0	0	3	0	0	0	0	0	0	0	0	0	0	1	0	17	0	0	0	0	4	7	11	0	471	533	359	0	15	0	0	0	0	0	21	0	0	0	753	608	0	46	0	0
OTU155	0	0	0	0	0	0	0	0	0	0	0	0	0	0	0	0	0	0	0	0	0	0	0	0	0	0	0	0	0	1418	486	46	0	0	0	0	0	0	0	0	0	0	0	0	0	0	0	0	0
OTU156	0	0	0	41	0	0	0	0	0	0	0	0	0	0	0	0	0	0	0	0	148	1	0	0	0	0	0	0	0	0	0	0	0	0	0	3	0	0	0	0	0	0	0	0	2	0	0	0	0
OTU157	2	0	1	31	0	0	116	221	0	0	0	0	0	0	0	1	0	7	0	0	9	20	4	0	0	2	0	69	0	5	38	7	4	63	0	0	0	0	1	267	57	2	1	3	2	0	28	0	0
OTU158	0	0	0	1	0	0	0	0	0	79	4	0	0	0	0	0	0	0	0	0	2	0	0	0	2	0	0	0	1	0	0	0	5	0	0	0	0	0	25	0	0	0	0	2	0	0	0	0	0
OTU159	25	0	4	379	31	0	2	0	0	50	32	7	189	0	0	1	0	5	1	0	54	7	23	11	898	23	13	0	1	9	19	3	19	0	0	11	40	0	353	4	4	10	0	9	5	0	0	0	0
OTU16	109	0	565	1337	494	33	82	12	686	368	570	919	1989	732	581	212	44	1356	10	750	396	29	328	97	1424	272	437	6	17	558	12754	2209	14914	9	7	390	675	17	14148	32	606	2825	10	780	411	103	7560	18	19
OTU160	1	0	5	164	11	0	140	168	0	0	0	0	0	0	5	10	1	0	0	5	4	2	0	0	0	2	23	1	0	3	0	0	13	0	0	817	5	0	0	2	0	0	1	0	21	0	1055	1	2
OTU161	3	0	3	75	4	0	0	0	0	7	11	49	50	0	0	1	0	1	0	0	3	2	2	1	1	16	2	0	0	0	0	2	15	0	0	0	2	0	1	0	2	1	0	1	0	0	0	0	0
OTU162	0	0	4	0	3	6	0	1	0	15	7	11	83	0	0	0	0	0	0	0	1	0	5	3	2	3	0	0	0	0	3	1	0	0	0	5	0	0	26	0	0	1	0	1	0	0	0	0	0
OTU163	0	0	0	5	3	0	1	0	0	1	10	0	20	0	0	0	0	0	0	0	0	0	2	0	19	0	0	0	0	0	0	0	0	0	1	0	0	0	34	0	0	1	0	0	0	0	0	0	0
OTU164	1	0	1	63	1	0	3	21	0	0	0	0	0	1	10	5	14	0	0	23	39	60	3	0	3	9	0	0	0	0	0	0	1	0	0	0	3	0	0	0	3	0	1	4	1	4	635	1	0
OTU165	0	0	0	0	0	3	0	0	9	0	0	0	0	0	5	1	0	0	0	0	0	0	0	0	0	0	0	0	1	0	0	0	0	0	0	0	0	0	8	10	0	0	0	0	0	0	0	0	1
OTU166	0	0	40	1971	259	0	4	4	0	38	19	11	0	7	0	0	0	0	0	0	1739	44	38	0	0	0	6	90	0	72	141	113	0	117	0	80	0	0	0	378	0	0	3	0	0	0	16	0	0
OTU167	2	0	0	0	0	0	9	72	0	1	0	0	39	0	0	0	0	1	0	0	0	0	0	0	0	0	0	0	0	0	6	3	0	0	0	0	0	0	40	0	11	0	0	0	1	0	918	0	0
OTU168	0	0	2	162	10	0	0	11	0	0	0	0	0	0	9	9	8	0	0	13	40	14	7	0	5	3	3	0	0	13	17	6	0	0	0	0	0	0	4	0	222	1	0	12	11	4	99	2	2
OTU169	0	0	0	0	0	0	3	10	0	0	0	0	0	0	0	1	0	0	0	1	0	0	0	0	0	0	0	20	0	0	0	2	0	13	0	0	0	0	0	32	0	0	0	0	0	0	2234	0	0
OTU17	3750	5537	3810	2193	4322	7	3387	4452	6	6	393	940	1664	850	15774	18044	8722	9679	960	25583	24	1	18	9085	2459	1153	151	1236	1	97	262	31	26	940	0	0	0	2	3	872	88	138	336	1	13	5969	26641	7237	13027
OTU170	0	0	0	31	0	0	0	0	0	18	31	0	37	0	0	0	0	0	1	0	0	0	0	1	1	0	0	0	0	0	0	0	2	0	0	0	1	0	661	0	0	0	0	0	0	0	0	0	0
OTU171	31	0	5	223	23	1	0	0	1	116	0	0	35	0	0	0	0	0	0	0	3	1	4	0	17	0	0	0	0	0	2	0	29	0	0	10	2	0	104	2	1	0	0	0	1	0	0	0	0
OTU172	0	0	0	17	0	0	18	33	0	0	0	0	0	0	2	12	31	3	0	4	4	0	0	1	0	0	30	1	0	0	0	0	0	0	0	0	0	0	0	6	0	0	0	0	0	3	92	1	0
OTU173	10	0	10	351	18	0	0	3	0	101	86	151	473	0	0	0	0	3	0	0	23	5	50	26	20	76	14	0	1	95	51	35	50	0	0	41	27	0	135	0	21	18	0	18	8	0	0	1	0
OTU1738	0	0	1	60	32	0	0	1	0	13	14	27	144	0	0	0	0	1	0	0	8	1	12	10	5	16	12	0	0	28	15	2	5	0	0	13	15	0	66	0	8	3	0	9	3	0	0	0	0
OTU174	13	0	16	68	1	1	0	0	0	151	2	4	26	0	0	0	0	1	0	0	30	0	3	2	6	3	0	0	0	1	0	0	33	1	0	2	5	0	48	0	0	1	0	0	0	0	0	0	1
OTU175	0	0	1	87	0	0	1	0	1	0	6	0	0	13	1	0	0	0	8	1	692	4	3	1	0	0	0	0	0	0	0	0	1	1	0	1	0	0	0	3	0	0	13	1	1	0	33	0	0
OTU176	1	0	0	39	7	0	0	0	0	497	17	5	186	0	0	0	0	1	1	0	9	1	18	8	63	6	4	0	0	2	18	2	82	0	0	4	9	0	779	0	0	1	0	1	1	0	0	0	0
OTU177	3	1	8	118	113	1	27	29	0	0	0	0	4	19	5	5	2	2	22	2	109	2	6	0	0	1	6	18	0	223	558	436	12	21	0	109	204	0	5	187	286	15	9	0	0	3	80	0	0
OTU178	0	0	4	74	1	0	50	25	0	0	0	0	0	0	1	1	1	0	0	0	8	7	0	0	2	0	8	0	0	8	0	0	0	0	0	0	0	0	0	0	0	0	0	0	0	0	123	0	0
OTU179	14	2	105	274	51	0	12	12	1	0	3	36	0	27	4	0	0	2	18	0	83	1	1	0	0	0	46	13	0	9	5	1	8	21	0	206	124	0	3	88	152	0	53	2	3	0	45	2	1
OTU18	0	0	0	0	0	0	0	0	0	0	0	0	0	1	0	0	0	0	0	0	0	0	0	0	0	0	0	0	0	0	0	0	0	0	2	0	0	0	0	0	0	0	0	0	0	0	0	17	0
OTU180	1	0	1	52	5	0	0	0	0	1445	92	55	0	0	0	0	0	4	1	0	0	0	7	7	4	3	0	0	0	0	0	1	9	0	0	0	2	0	1377	0	0	2	0	0	0	0	2	0	0
OTU181	0	0	1	27	1	0	0	0	0	0	0	0	0	0	0	0	0	0	0	0	68	0	0	24	6	1	100	8	0	12	7	14	0	7	0	0	0	0	0	11	11	0	0	0	0	0	0	0	0
OTU1817	2	0	2	0	0	0	0	1	0	6	0	7	32	0	1	0	0	1	0	2	0	0	2	10	1	9	6	0	0	16	0	0	13	0	0	2	0	0	33	1	0	3	1	1	0	0	0	0	0
OTU182	6	0	5	328	10	0	0	0	0	2	85	266	17	0	0	0	0	4	2	0	116	0	379	128	2	22	8	0	0	12	6	3	35	0	0	22	6	0	96	0	2	1	0	6	1	0	0	0	0
OTU183	0	0	1	42	1	0	0	0	0	1	7	0	16	0	0	0	0	12	0	0	106	6	88	26	34	48	7	0	0	20	8	12	368	0	0	40	51	0	778	0	71	586	0	16	12	0	2	0	0
OTU184	0	0	0	15	11	0	0	1	0	0	0	0	0	6	0	0	0	0	46	0	62	103	165	0	0	1	24	0	0	0	0	0	0	0	0	1	0	0	0	0	0	0	41	0	0	0	0	0	0
OTU185	6	0	1	134	16	1	1	1	0	24	7	24	242	0	0	2	0	1	0	0	3	2	16	2	23	22	0	0	0	25	4	12	10	0	0	0	23	0	93	0	5	11	0	5	1	0	0	0	0
OTU186	0	0	3	54	4	0	0	0	0	48	4	0	55	1	0	0	0	0	0	0	11	1	3	3	42	4	5	0	0	13	10	6	17	0	0	4	25	0	680	0	0	0	0	0	0	0	0	0	0
OTU187	0	0	0	0	0	0	0	0	0	0	0	0	0	0	33	24	56	0	0	36	2	0	0	0	0	0	0	0	0	0	0	0	0	0	0	0	0	0	1	0	0	0	0	0	0	16	1075	8	5
OTU188	8	1	9	0	1	1	3	5	0	455	0	5	11	0	4	6	1	0	0	0	4	0	3	2	15	0	0	0	0	0	0	0	34	0	0	0	2	0	0	1	0	0	0	0	0	2	0	2	0
OTU189	94	0	423	170	213	2	72	18	0	3	4	1	0	2	0	2	8	8	59	6	200	7	12	13	117	227	258	71	0	57	58	97	4	89	0	379	29	0	26	45	815	51	0	23	18	1	20	0	0
OTU19	1662	1748	2129	1163	208	175	3872	4319	356	5	3520	130	126	3166	11250	9340	3666	2425	229	8041	1508	26	15	637	3474	5515	1007	88	381	4809	855	354	694	39	328	539	2144	55	38	159	856	240	2602	15791	9776	8103	48	5447	6355
OTU190	0	0	0	0	0	0	0	0	0	0	0	0	0	0	0	0	0	0	0	0	0	0	0	0	5	0	0	0	0	0	1	0	0	0	0	0	1	0	28	0	0	0	0	2	0	0	0	0	0
OTU191	0	0	1	3	1	0	0	0	0	1	1	8	3	0	0	0	0	0	0	0	2	0	0	0	29	0	0	0	0	4	0	1	0	0	0	2	3	0	80	0	1	0	0	0	0	0	0	0	0
OTU192	34	1	24	983	153	0	7	9	0	135	190	514	1329	0	0	0	0	30	4	0	126	28	117	99	62	168	43	0	1	245	139	78	152	0	0	131	159	0	85	0	66	63	0	83	29	0	1	0	0
OTU193	7	2	1	155	2	15	366	68	5	22	6	11	11	0	4	3	1	0	0	2	36	0	3	1	1	1	19	5	0	53	36	16	1	7	1	50	0	0	33	14	0	0	1	13	9	2	119	2	0
OTU1934	0	0	2	85	1	0	1	1	0	5	0	20	1	0	0	0	0	0	0	0	0	0	0	1	0	0	0	0	0	0	0	0	0	0	0	2	2	0	24	0	0	0	0	2	0	0	0	0	0
OTU194	0	0	0	0	0	0	0	0	0	0	0	0	0	0	0	0	0	0	0	0	14	0	0	0	0	0	0	0	0	0	0	0	0	0	0	0	0	0	0	0	0	0	0	0	1	0	1	0	0
OTU195	0	0	0	0	0	0	0	0	0	1	0	0	1	0	0	0	0	6	2	0	40	16	65	28	20	35	4	0	0	9	30	21	217	0	0	29	33	0	734	0	0	0	0	0	17	0	0	0	0
OTU196	5	0	1	0	0	0	12	11	0	0	0	0	0	0	10	21	16	0	0	13	0	0	0	0	0	2	3	0	0	0	2	0	0	0	0	0	0	0	0	0	0	0	0	0	0	16	156	10	1
OTU197	0	0	0	40	1	0	219	112	0	1	0	0	0	27	0	0	1	0	0	1	69	0	0	0	4	4	173	0	0	1	0	0	0	0	0	0	0	0	0	0	1	0	1	0	0	0	35	0	0
OTU198	0	0	0	22	0	0	0	0	0	0	0	0	16	0	0	0	0	0	0	0	0	0	0	0	5	0	0	0	0	0	0	0	0	0	0	0	0	0	0	0	0	0	0	0	0	0	0	0	0
OTU199	0	0	0	0	0	0	0	0	0	0	0	0	0	0	0	0	0	0	0	0	0	0	0	0	0	0	0	0	0	0	0	0	0	0	0	0	0	0	0	0	0	0	0	0	0	0	0	0	0
OTU2	1	0	6	66	0	2366	0	1	1631	244	25	19	35	18	10	14	19	1	1	6	2	0	6	4	1	1	1	11	10219	1	3	1	0	23	9030	2	1	655	157	6	3	1	3	8	2	0	1	16	24
OTU20	0	0	2	91	0	0	0	0	0	0	0	0	39	114	4	13	0	2700	780	3	210	3	10	0	0	0	1	0	0	0	0	2	53	0	0	2	0	0	0	8	0	1	9	0	0	1	0	0	0
OTU200	0	0	0	0	0	0	0	0	0	1	0	7	18	0	0	0	0	0	0	0	4	0	3	0	19	2	1	0	0	5	1	1	4	0	0	0	0	0	92	0	0	0	0	0	0	0	0	0	0
OTU201	0	0	0	0	0	0	0	0	0	0	0	0	0	0	0	0	0	0	14	0	281	83	18	0	0	0	20	0	0	0	0	0	0	0	0	0	0	0	0	0	0	0	0	0	0	0	0	0	0
OTU202	7	0	7	140	19	0	1	0	0	36	25	61	188	0	0	0	0	6	3	0	13	2	33	16	5	23	3	0	0	32	7	12	32	0	0	35	12	0	270	0	9	4	0	17	3	0	0	0	0
OTU203	0	0	0	0	0	0	0	0	0	0	0	0	0	0	0	0	0	0	0	0	0	0	0	0	0	0	0	0	0	0	0	0	0	0	0	0	0	0	28	0	0	0	0	0	0	0	0	0	0
OTU204	0	0	0	0	0	0	0	0	0	0	0	0	0	0	0	0	0	0	3	0	0	0	0	0	0	4	0	0	0	0	0	0	0	0	0	0	0	0	0	0	0	0	0	0	0	0	0	0	0
OTU205	0	0	0	0	0	0	0	0	0	5	0	0	0	0	0	0	0	0	0	0	0	0	0	0	0	0	0	0	1	0	0	0	1	0	0	0	0	0	13	0	0	0	0	0	0	0	0	0	0
OTU206	0	0	0	0	0	0	0	0	0	5	0	0	0	0	0	1	0	0	0	0	0	0	0	0	0	0	0	0	0	3	0	0	0	0	0	0	0	0	0	1	0	0	0	0	0	0	0	0	0
OTU207	0	0	0	0	0	0	0	0	0	0	0	0	0	0	0	0	0	0	0	0	104	0	0	0	0	0	0	0	0	0	0	0	0	0	0	0	0	0	0	0	0	0	0	0	0	0	0	0	0
OTU208	0	0	0	0	0	1	21	24	4	4	0	0	2	1	65	83	31	36	0	31	2	28	0	0	0	0	11	19	0	2	3	2	0	15	0	0	0	0	11	16	16	0	0	0	0	14	75	10	1
OTU209	0	0	2	24	19	1	2	10	4	0	0	0	0	1	8	4	4	0	0	8	19	10	1	0	2	1	2	0	0	0	1	0	3	1	0	0	0	0	0	7	10	0	0	0	0	3	434	0	2
OTU21	1389	195	1894	341	619	1	4	2	4	151	5953	7269	3	599	0	1	2	0	173	0	3826	2633	6403	88	3	17	1331	575	0	7	51	3572	0	539	1	49	0	0	0	9632	0	1	1173	89	21	0	9	0	1
OTU210	0	1	0	53	3	0	8	79	0	0	3	0	1	35	0	1	0	206	88	0	0	0	1	26	8	0	10	81	0	29	22	7	17	64	0	0	0	0	2	131	80	0	12	1	0	0	1632	0	0
OTU211	0	0	0	0	0	0	0	0	5	2	0	0	7	0	1	0	0	0	0	1	0	0	0	0	0	5	0	0	0	0	0	0	0	0	0	0	0	0	0	3	0	0	0	0	0	0	0	0	0
OTU212	0	0	0	0	0	0	6	5	0	0	0	0	0	0	0	0	0	0	0	0	4	27	2	4	4	0	0	0	0	0	0	0	3	0	0	0	0	0	2	0	69	0	0	0	0	0	58	0	0
OTU213	0	0	1	0	6	0	0	0	0	442	5	2	0	0	0	0	0	1	0	0	9	0	7	0	18	13	7	0	0	0	16	0	55	0	0	0	5	0	289	0	0	1	0	0	1	0	0	0	0
OTU214	1	0	3	92	5	33	3	43	7	0	0	0	0	5	6	19	14	0	0	14	38	30	23	0	1	0	8	8	0	3	10	5	1	0	0	1	0	0	2	14	34	0	0	1	0	9	639	4	2
OTU215	7	0	8	94	23	0	9	74	3	492	53	60	162	0	0	1	0	264	1	0	13	0	30	19	80	37	3	0	1	18	142	301	81	0	0	21	10	0	406	0	9	11	0	46	1	0	0	1	0
OTU216	1	0	1	62	7	0	2	0	0	0	0	0	0	30	3	0	1	0	194	0	737	7	6	119	63	15	5	4	0	9	0	0	2	2	0	14	1	0	0	14	0	0	2	9	3	0	95	1	0
OTU217	0	0	0	0	0	0	0	0	0	0	10	0	0	0	0	0	0	4	0	0	47	3	26	13	12	11	18	0	0	7	43	0	395	0	0	46	28	0	429	0	3	5	0	0	1	0	0	0	0
OTU218	22	0	0	41	1	1	0	0	3	0	0	10	41	0	0	0	0	48	0	0	0	0	0	0	1	5	0	0	0	3	0	0	6	0	0	0	6	0	3	0	1	1	0	1	0	0	1	0	0
OTU219	0	0	1	25	0	0	0	0	0	2	0	0	0	0	0	0	0	0	0	0	0	0	0	0	0	0	0	0	0	0	0	0	5	0	0	0	0	0	94	0	267	5	0	50	32	0	0	0	0
OTU22	154	2	221	923	21	0	1	0	0	169	1152	16	214	2903	0	1	0	30	0	1	1477	21	86	19	9	40	2191	0	0	1721	387	184	45	2	0	9	7	0	236	0	6279	91	929	2512	1884	0	1	0	1
OTU220	0	0	0	19	0	0	0	1	0	3	1	0	0	0	0	0	0	0	0	0	0	0	0	0	21	3	0	0	0	2	0	0	1	0	0	0	0	0	9	0	0	0	0	0	0	0	0	0	0
OTU221	0	0	0	0	0	0	0	0	0	3	0	0	0	0	0	0	0	0	0	0	6	0	2	5	9	0	3	0	0	0	0	0	0	0	0	0	4	0	1027	0	0	0	0	0	0	0	0	0	0
OTU222	0	0	0	21	8	0	1	0	0	3	16	12	48	0	0	1	0	0	0	1	4	1	4	0	25	0	2	0	0	12	0	1	1	0	0	5	1	0	137	0	1	3	0	5	1	0	0	0	0
OTU223	116	25	223	77	2	0	0	0	0	0	0	0	0	0	4	5	4	0	1	10	86	3	19	0	0	0	10	22	0	0	3	5	0	16	0	0	0	0	0	37	0	0	0	23	38	0	0	0	0
OTU224	0	0	0	46	0	0	16	33	0	0	0	0	0	12	5	7	5	0	0	3	224	26	5	0	1	0	0	0	0	0	0	0	2	0	0	0	0	0	0	0	0	0	0	5	2	0	354	0	0
OTU225	24	1	7	110	0	0	1	0	0	0	2	3	0	0	0	0	0	0	0	0	30	3	101	33	14	22	7	0	0	39	84	77	68	0	0	91	48	0	1	0	29	6	0	3	2	0	1	0	0
OTU226	0	0	0	108	10	0	9	49	0	0	0	0	0	1	33	16	11	0	0	16	8	7	2	0	0	0	0	9	0	1	2	5	1	3	0	0	0	0	0	4	0	0	0	1	3	8	216	5	4
OTU227	1	0	1	19	10	0	0	0	0	16	7	17	57	0	0	0	1	0	0	0	3	2	5	1	7	7	3	0	0	9	3	0	0	0	0	7	5	0	53	0	2	0	0	2	0	1	0	0	0
OTU228	1	0	0	2	0	5	0	0	4	0	1	0	0	0	1	4	0	0	0	1	0	1	6	0	1	0	1	0	4	1	1	2	7	0	5	2	7	1	0	36	5	1	0	2	1	11	0	0	2
OTU229	0	0	0	26	7	0	0	0	0	0	41	9	0	0	0	0	0	0	0	0	0	0	0	0	0	0	0	0	0	0	0	0	0	0	0	0	0	0	0	0	0	0	0	0	0	1	0	0	0
OTU23	39	1	933	12	1231	0	123	177	0	4	1	0	0	894	1	0	0	61	2225	1	1748	2489	10060	233	19	27	46	9	0	1555	878	1378	0	10	0	0	0	0	8	269	0	131	528	1	1	0	14	2	0
OTU230	0	0	0	15	52	0	1	3	0	0	0	0	0	0	0	0	0	0	3	2	108	130	112	0	0	0	3	0	0	19	63	10	0	0	0	0	0	0	0	0	0	0	0	0	0	0	0	0	0
OTU231	0	0	1	0	0	0	0	0	0	307	14	0	17	0	0	0	0	0	0	0	2	0	12	0	22	0	1	0	0	0	4	0	82	0	1	0	0	0	39	0	0	0	0	0	0	0	1	0	0
OTU232	0	0	0	0	0	0	0	0	0	0	0	2	0	0	0	0	0	0	0	0	0	0	0	0	1	0	0	0	0	0	4	0	0	0	0	0	0	0	7	0	0	1	0	0	0	1	0	0	0
OTU233	0	0	0	28	5	0	0	1	0	0	0	0	0	0	0	0	0	0	5	0	393	4	26	0	0	0	0	4	0	0	0	0	0	16	0	0	0	0	17	16	0	0	2	0	0	0	21	0	0
OTU234	0	0	0	4	15	0	0	0	0	13	3	7	20	0	0	1	0	335	1	0	1	0	2	1	9	6	0	0	0	15	8	4	3	0	0	13	11	1	83	0	9	4	0	4	7	0	1	0	0
OTU235	0	0	0	0	1	0	0	0	0	7	11	0	0	0	0	1	0	1	0	0	2	1	0	7	0	0	0	0	0	0	0	3	2	0	0	1	5	0	47	0	3	0	0	2	0	0	0	0	0
OTU236	3	0	0	0	2	0	87	65	0	0	0	0	0	0	11	12	7	0	1	9	0	44	0	0	0	0	2	1	0	3	5	6	34	0	0	0	0	0	0	2	0	0	0	0	0	1	96	1	1
OTU237	0	0	0	0	0	0	0	0	0	1355	5	0	28	0	0	0	0	0	0	0	3	0	5	0	39	0	1	0	0	8	4	0	176	0	0	9	2	0	116	0	2	0	0	0	2	0	0	0	0
OTU238	0	0	0	5	0	0	0	0	0	5	6	0	8	0	0	0	0	0	0	0	3	0	7	3	3	1	3	0	0	0	1	1	5	0	0	3	7	0	29	0	3	0	0	0	0	0	0	0	0
OTU239	0	0	0	32	4	0	1	0	0	0	2	0	16	0	0	0	0	0	0	0	3	0	2	2	1	1	21	0	0	0	7	1	1	0	0	0	1	0	698	0	1	0	0	7	0	0	0	0	0
OTU24	0	0	0	0	4	0	0	0	0	29	0	0	51	0	0	0	0	0	1	2	8	0	5	11	2	4	3	0	0	8	2	0	6	0	0	0	4	0	105	0	2	6	0	2	0	0	0	13	0
OTU240	4	1	2	0	0	0	24	66	0	0	0	0	0	0	0	0	0	0	0	0	0	0	0	0	0	0	0	0	0	0	7	3	29	0	0	0	0	0	0	0	0	0	0	0	0	0	0	0	0
OTU241	3	0	4	94	10	0	0	0	0	15	27	19	22	0	0	0	0	2	1	0	6	1	0	0	104	8	0	0	0	10	4	5	10	0	0	17	18	0	176	0	2	6	0	38	1	0	0	0	1
OTU242	0	0	5	108	43	0	0	4	0	0	0	0	0	0	0	0	0	0	4	0	21	4	16	0	0	0	3	12	0	0	1	0	0	8	0	0	0	0	0	14	0	0	0	58	4	0	4	1	0
OTU243	0	0	0	0	0	0	0	0	0	0	0	0	1	0	0	0	0	6	0	0	70	13	75	16	15	32	14	0	0	8	22	7	206	0	0	32	48	0	736	0	2	0	0	1	1	0	0	0	0
OTU244	0	0	3	228	14	0	7	35	0	0	0	0	0	0	13	24	9	0	0	15	3	6	5	0	0	0	6	0	0	11	17	2	6	0	0	0	3	0	0	0	0	0	0	0	0	14	208	3	3
OTU245	0	0	0	0	0	0	0	0	0	0	0	0	0	0	0	0	0	0	17	0	325	1	22	0	0	0	2	3	0	3	5	0	0	6	0	0	0	0	1	6	17	0	0	0	0	0	3	0	0
OTU246	0	0	0	3	2	0	0	0	0	0	0	1	0	6	0	0	0	0	0	0	146	82	91	0	0	0	1	0	0	0	0	0	0	0	0	0	0	0	0	0	0	0	14	0	0	0	46	0	0
OTU247	35	0	1	238	8	0	1	0	2	23	27	9	268	0	0	0	0	1	0	0	24	0	4	6	102	0	0	0	0	1	8	2	17	0	0	6	23	0	80	0	0	0	0	28	1	0	0	0	0
OTU248	0	0	0	0	0	0	0	0	0	0	0	0	0	0	0	0	0	0	0	0	2	0	0	0	3	0	8	0	0	0	8	0	5	0	0	1	2	0	782	0	0	0	0	2	0	0	0	0	0
OTU249	0	0	1	0	0	0	0	0	0	0	0	0	0	0	0	0	0	7	0	0	50	9	46	5	14	11	2	0	0	9	15	4	372	0	0	23	17	0	197	0	0	2	0	0	4	0	0	0	0
OTU25	8	0	8	279	10	1	1	3	1	29673	115	69	199	1	1	3	1	4	0	0	28	1	381	5	191	18	4	0	7	19	6	20	5413	4	0	8	12	2	250	4	1	0	0	11	5	0	1	0	0
OTU250	0	0	2	93	7	0	2	5	0	0	0	0	0	7	17	15	3	0	0	11	94	11	4	0	0	1	7	0	0	0	0	0	0	0	0	0	0	0	0	0	27	0	1	81	56	4	212	1	0
OTU251	0	0	6	304	5	0	0	0	0	0	0	0	0	1	22	23	24	0	0	18	19	0	0	0	0	0	0	0	0	0	0	0	0	0	0	0	0	0	0	0	0	0	0	0	0	2	0	1	0
OTU252	7	0	0	0	21	0	0	0	2	1	6	11	362	0	0	0	1	2	0	3	0	0	6	25	1	58	0	0	0	0	2	11	6	0	0	11	30	0	418	0	0	3	0	0	0	0	0	0	0
OTU253	21	0	10	529	67	0	2	4	0	113	74	142	677	0	0	0	0	5	4	0	52	8	106	27	27	120	17	0	0	167	52	39	121	0	0	71	89	0	50	0	48	38	0	61	12	0	0	0	0
OTU254	0	1	0	0	1	2	12	12	2	0	0	0	0	0	3	8	5	0	0	3	0	0	0	0	1	0	0	1	0	0	0	0	2	1	0	0	0	0	7	2	0	0	0	0	0	3	206	4	0
OTU2556	6	17	22	0	0	0	8	60	0	0	0	0	0	5	0	0	0	3	9	0	0	0	0	19	2	0	7	0	0	0	1	1	0	7	0	0	0	0	0	1	1	0	15	0	0	0	6	0	0
OTU257	0	0	0	0	0	0	0	0	0	0	0	0	0	0	0	0	0	0	0	0	0	0	0	0	0	0	0	0	0	0	0	0	0	0	0	0	0	0	0	0	0	0	0	0	0	0	0	0	0
OTU258	4	0	6	16	3	1	0	0	0	2	1	0	38	0	0	0	0	646	0	0	3	0	0	0	3	0	6	1	0	9	0	1	1	0	0	4	0	0	36	0	2	1	0	5	2	0	0	0	0
OTU259	0	0	0	0	3	4	9	19	2	0	0	0	0	0	3	8	4	0	0	7	0	3	0	3	1	0	4	1	0	0	1	0	7	1	0	0	0	0	2	6	90	0	0	8	3	5	92	4	2
OTU26	485	0	12	343	14	1	2	2	4	767	130	99	722	4	3	8	1	3	0	0	22	2	30	13	140	34	2	0	0	25	11	16	105	3	0	24	37	0	862	18	8	12	1	30	3	0	0	0	5
OTU260	0	0	0	30	3	0	0	0	4	0	7	0	1	0	3	2	0	0	0	1	0	0	0	2	1	6	0	0	0	0	0	1	1	0	0	0	0	0	8	1	0	2	0	16	12	0	0	0	0
OTU261	0	0	0	0	0	1	0	0	0	0	0	0	0	0	0	0	0	0	0	0	1	0	0	0	0	0	0	0	0	1	0	0	0	0	0	0	0	0	0	0	0	0	0	0	0	0	0	0	0
OTU262	0	0	0	6	0	0	0	0	0	134	2	9	0	0	0	0	0	0	0	0	0	0	4	0	1	0	1	0	0	0	0	0	16	0	0	1	1	0	34	0	0	0	0	4	1	0	0	0	0
OTU263	0	0	1	9	0	0	0	0	0	3	7	1	0	0	0	0	0	0	0	0	9	0	0	0	22	1	6	0	0	0	0	3	2	0	0	6	1	0	115	0	0	0	0	50	1	0	0	0	0
OTU265	0	0	0	7	7	1	1	2	2	2	10	5	13	1	0	0	0	7	3	0	3	1	0	6	14	1	0	0	0	1	0	1	0	0	1	1	4	0	23	0	4	0	0	1	1	1	0	0	0
OTU266	0	0	0	0	0	0	0	0	0	3	0	0	0	0	0	0	0	0	0	0	1	1	10	0	3	5	16	0	0	0	14	0	0	0	0	10	1	0	599	0	0	0	0	0	2	0	0	0	0
OTU267	0	0	0	0	0	0	1	0	0	0	0	0	0	0	69	96	34	0	0	53	0	0	0	0	0	0	0	0	0	0	0	0	0	0	0	0	0	0	0	0	0	0	0	0	0	8	316	0	0
OTU269	0	0	0	0	0	0	0	0	0	0	0	0	0	0	0	0	0	0	0	0	386	9	7	0	0	0	0	0	0	0	0	0	0	0	0	0	0	0	0	0	0	0	0	0	0	0	0	0	0
OTU27	0	0	0	0	0	0	2	0	2	0	2	0	0	31	4203	7891	6317	0	0	1839	0	0	0	1	0	1	1	0	0	0	0	0	7	0	0	1	0	1	0	1	0	0	0	474	676	2239	0	2406	1395
OTU270	1	0	0	0	0	0	6	8	0	0	0	0	0	0	1	0	0	0	0	0	0	0	0	0	0	0	0	0	0	0	0	0	0	0	0	0	0	0	0	0	0	0	0	0	0	0	37	0	0
OTU271	0	0	0	1	0	0	0	0	0	0	0	0	29	0	0	0	0	0	0	0	0	0	0	0	0	0	0	0	0	0	0	0	0	0	0	0	0	0	29	0	4	0	0	1	0	0	0	0	0
OTU272	2	0	0	37	5	0	0	0	0	17	15	37	165	0	0	0	0	2	0	0	18	0	3	0	44	6	0	0	0	0	4	4	0	0	0	5	0	0	176	0	6	0	0	0	1	0	0	0	1
OTU273	0	0	0	0	3	1	16	33	0	0	0	0	0	0	2	0	1	0	1	2	2	12	0	0	0	0	4	2	0	0	1	5	5	1	0	0	0	0	0	4	17	0	1	0	4	1	49	0	1
OTU274	15	0	10	586	56	0	1	1	0	44	77	202	434	0	0	0	0	7	4	0	26	7	55	21	18	70	5	0	0	94	36	22	60	0	0	48	37	0	11	0	12	20	0	27	5	0	0	0	0
OTU275	18	1	1	96	3	0	0	1	0	1	0	0	0	0	0	0	0	0	1	0	53	2	82	37	12	15	6	0	0	96	104	53	82	0	0	85	36	0	0	0	18	6	0	9	1	0	0	0	0
OTU276	0	0	0	0	0	6	0	0	4	1	0	1	67	1	0	3	1	5	1	2	0	0	2	1	0	0	1	0	3	0	0	0	3	0	1	3	1	1	19	5	0	1	0	0	0	0	0	0	1
OTU277	9	0	4	197	13	1	1	0	0	91	30	14	138	0	0	0	0	0	0	0	44	4	8	0	133	2	3	0	0	0	5	5	28	0	0	17	7	0	221	0	4	5	0	0	1	0	0	0	0
OTU279	0	0	1	50	1	0	1	0	0	3	1	18	17	0	0	0	0	0	2	0	0	0	8	0	0	3	0	0	0	3	2	1	1	0	0	1	1	0	28	0	1	0	0	2	0	0	0	0	0
OTU28	2	0	0	34	0	0	0	1	0	4887	18	15	45	0	0	0	1	0	0	0	6	1	38	6	135	6	0	0	0	0	0	2	895	14	1	5	4	2	84	0	3	1	0	5	1	1	0	0	0
OTU280	0	0	0	0	0	0	1	0	0	0	0	0	0	0	0	0	0	1	0	0	6	0	0	0	0	0	0	0	0	1	0	0	0	0	0	24	1	0	0	0	0	0	0	0	0	0	0	0	0
OTU282	0	0	0	0	1	0	0	0	0	0	0	1	8	0	0	0	0	550	0	0	0	0	0	0	0	0	0	0	0	0	0	0	1	0	0	0	0	0	0	0	0	0	0	0	0	0	0	0	0
OTU283	0	0	0	3	0	0	0	0	0	0	0	0	0	0	0	0	0	0	0	0	5	0	0	0	0	0	0	0	0	0	0	0	0	0	0	0	0	0	0	0	0	0	0	0	0	0	21	0	0
OTU284	0	0	2	147	0	0	15	3	0	10	0	0	0	11	0	0	0	0	0	0	292	0	3	4	0	0	0	0	0	4	6	2	0	0	0	0	0	1	39	0	398	10	0	9	9	0	2	0	0
OTU286	0	0	0	0	0	0	0	0	0	0	0	0	0	0	0	0	0	0	0	0	0	0	0	0	0	0	0	0	0	0	0	0	15	0	0	0	0	0	0	0	0	0	0	0	0	0	0	0	0
OTU287	2	0	1	16	0	3	1	1	2	1	2	30	0	0	1	0	0	2	0	2	2	0	10	1	8	1	0	0	0	8	8	0	0	0	0	6	0	0	100	0	3	4	0	1	1	0	0	0	0
OTU29	2558	4243	3710	85	4	4	1296	1002	9	2	11	4	80	761	0	1	0	521	9	0	58	1	4	2312	901	331	1428	122	0	187	344	905	102	95	1	0	0	0	3	311	185	217	1077	0	1	1	13	0	0
OTU291	10204	1549	4404	157	193	2	239	99	0	41	6786	12757	5003	52	4	9	12	11787	417	1	291	328	65	1379	139	14	1019	479	1	125	338	835	27	581	0	0	2	1	37	4920	237	106	14	45442	49732	2	1491	1	3
OTU292	0	0	0	0	0	0	0	0	0	0	0	0	0	0	0	0	0	0	0	0	0	0	0	0	9	0	0	0	0	0	0	0	0	0	0	0	0	0	2	0	0	0	0	0	0	0	0	0	0
OTU293	0	0	0	0	0	0	0	0	0	3	0	0	0	0	0	0	0	0	0	0	0	0	0	0	0	0	0	0	0	0	0	0	0	0	0	0	0	0	0	0	0	0	0	0	0	0	0	0	0
OTU294	17	0	1	173	19	0	1	3	0	15	58	111	429	0	0	0	0	4	3	0	21	4	29	19	9	63	3	0	0	41	41	8	31	0	0	41	10	0	12	0	19	17	0	20	3	0	0	0	0
OTU2955	93	2	884	40	88	0	9	3	0	28	23	8	18	3	3	2	1	19	2	0	248	46	13	118	25	2	28	52	0	124	66	114	3	92	0	25	1	0	304	57	25628	13950	0	99	126	1	21	1	1
OTU296	62	0	5	394	29	1	0	0	0	53	6	9	62	0	0	0	0	0	0	0	10	3	0	0	6	0	0	0	0	6	0	2	4	0	0	1	0	0	33	0	0	0	0	3	0	0	0	0	0
OTU297	0	0	1	37	0	0	0	0	0	64	6	2	31	0	4	1	0	0	0	0	5	0	6	1	1	0	1	0	0	0	6	0	8	0	0	0	0	0	64	0	0	0	0	0	0	2	0	0	0
OTU298	0	0	0	14	0	0	12	49	0	0	0	0	0	0	3	3	1	0	0	3	93	164	1	0	0	1	3	0	0	2	1	0	0	0	0	0	0	0	0	0	1	0	0	0	1	8	52	1	0
OTU299	0	0	0	12	25	2	4	0	0	0	4	0	1	2	16	30	11	26	6	3	12	13	0	0	0	0	2	7	0	0	0	0	0	5	0	0	0	0	0	11	0	0	4	0	0	5	12	1	1
OTU3	1	10	0	0	0	41250	0	0	68440	0	0	11	16	9	11	3	6	66	0	1	0	0	0	0	11	1	0	2	52943	5	2	2	243	40	61423	1	24	70241	16	5	84	121	0	2	0	5	10	13	1
OTU30	4	0	10	62	0	62	17	10	38	1	63	32	1129	339	2	0	0	59	105	2	762	2	18	4	12	56	4282	852	1	19	19	41	19	1001	1	0	1	12	151	361	9736	4083	86	45	35	0	2	0	0
OTU300	1	0	2	58	9	0	0	0	0	7	3	17	31	0	0	0	0	0	1	0	6	0	2	0	6	5	1	0	0	3	11	1	8	0	0	1	3	0	37	2	0	3	0	1	0	0	0	0	1
OTU301	2	1	0	1	0	0	0	0	5	0	0	0	5	0	0	1	1	16	0	0	0	0	0	1	2	3	0	0	0	1	1	0	0	0	0	7	37	0	4	0	0	1	0	373	167	0	0	0	0
OTU302	0	0	0	17	25	0	8	49	0	0	8	30	0	4	0	0	0	0	0	0	3	1	3	2	1	0	0	5	0	2	5	13	0	2	0	0	0	0	1	12	9	0	0	0	1	0	420	0	0
OTU303	0	0	0	0	0	0	0	0	0	0	0	0	0	0	0	0	0	0	0	0	11	0	0	0	0	0	0	0	0	0	0	0	0	0	0	0	0	0	0	0	0	0	0	0	0	0	5	0	0
OTU304	6	0	10	493	34	0	0	3	0	39	54	92	558	0	0	0	0	6	1	0	19	7	37	20	10	61	8	0	0	72	24	23	72	0	0	28	51	0	15	0	18	13	0	18	7	0	0	0	0
OTU306	2	0	0	220	6	0	1	0	0	11	13	26	77	0	0	0	0	1	0	0	0	0	0	7	3	0	1	0	0	22	9	4	10	0	0	5	4	0	47	0	1	2	0	3	2	0	1	0	0
OTU307	0	0	0	0	0	0	0	0	0	0	0	0	0	0	0	0	0	0	0	0	1	0	0	0	0	0	0	0	0	0	0	1	0	0	0	0	0	0	0	0	1	0	0	0	0	0	0	0	0
OTU309	0	0	1	33	59	0	7	33	0	0	0	0	0	25	0	0	0	0	0	0	0	0	0	0	0	0	1	27	0	28	66	77	0	26	0	0	0	0	0	97	51	3	15	0	0	0	5	0	0
OTU31	3886	909	697	87	332	90	0	0	365	14	613	222	700	0	0	0	0	74	2842	0	10	2	0	1	1	15	1154	4537	1	1	0	0	1226	2851	0	0	0	4	1	1075	22	0	0	11	1	1	8	0	0
OTU311	0	0	0	0	0	0	0	0	0	0	0	0	0	0	0	0	0	0	2	0	229	0	0	0	0	0	0	0	0	0	0	0	0	0	0	0	0	0	0	0	0	0	0	0	0	0	0	0	0
OTU312	9	0	6	369	44	0	0	3	0	25	36	109	334	0	0	0	0	5	1	0	14	5	34	12	23	42	10	0	0	84	27	17	38	0	0	44	64	0	13	0	12	15	0	24	5	0	0	0	0
OTU313	10	0	0	60	0	0	1	0	0	0	1	0	0	0	0	0	0	0	0	0	30	3	52	29	7	14	10	0	0	60	64	28	33	0	0	40	21	0	1	0	18	2	0	3	1	0	1	0	0
OTU314	4	0	7	57	0	0	0	0	0	295	9	0	26	0	0	0	0	0	0	0	56	0	21	0	17	5	0	0	0	0	1	0	56	0	0	2	0	0	34	0	2	0	0	0	0	0	0	0	0
OTU315	0	0	1	0	7	0	16	9	0	4	0	0	39	0	0	0	0	0	0	0	2	0	0	0	25	5	0	0	0	0	4	0	0	0	0	0	1	0	47	0	0	1	0	0	0	0	2	0	0
OTU3158	34	1	13	16	38	0	21	7	0	1	8	69	49	0	0	0	0	60	21	0	0	49	11	16	27	41	112	0	0	46	49	19	12	0	0	0	0	0	5	0	125	138	0	237	279	0	0	0	0
OTU318	0	0	0	0	0	0	0	0	0	0	0	0	0	0	7	2	2	0	0	5	51	113	23	0	0	0	0	0	0	5	2	0	0	0	0	0	0	0	0	0	0	0	0	0	0	1	136	0	0
OTU319	0	0	0	17	7	0	0	0	0	36	0	2	21	0	0	0	0	0	0	0	4	1	1	0	6	1	1	0	0	0	4	0	3	0	0	0	5	0	422	0	0	0	0	0	1	0	0	0	0
OTU32	30	9	129	9	2	4153	13	144	1303	0	0	0	3	3	337	988	3135	0	0	92	2	59	3	3	23	18	0	59	11	0	3	2	139	50	4	9	35	33	1	115	8	1	1	0	0	597	34	1021	318
OTU320	0	0	0	0	0	0	0	0	0	0	0	0	0	0	0	0	0	0	0	0	0	0	0	0	0	0	0	0	0	0	0	0	0	0	0	0	0	0	0	0	0	0	0	0	0	0	0	0	0
OTU322	20	1	9	590	84	1	4	2	0	93	170	326	888	0	0	1	0	2	4	0	24	16	118	53	37	105	24	0	0	141	65	46	92	0	0	93	72	0	46	0	52	28	0	36	22	0	0	0	0
OTU325	0	0	0	19	0	0	0	0	0	0	0	0	0	0	0	0	0	0	0	1	0	0	0	0	0	0	0	0	0	0	0	0	0	0	0	0	0	0	0	0	0	0	0	0	0	0	0	0	0
OTU326	0	0	0	0	0	0	0	0	0	0	3	0	0	0	1	0	0	0	0	0	0	0	0	0	0	0	0	0	0	0	0	0	0	0	0	0	31	0	0	0	0	0	0	0	0	0	0	0	0
OTU328	2	0	2	22	9	0	0	0	2	24	19	97	154	0	1	0	0	3	2	0	14	4	29	2	11	24	6	0	0	28	4	3	13	0	0	9	6	0	159	0	3	5	0	8	2	0	1	0	0
OTU329	9	0	2	174	28	0	1	1	0	20	24	41	304	0	0	0	0	1	1	0	12	1	39	5	7	13	6	0	0	14	3	10	34	0	0	16	27	0	29	0	5	5	0	6	1	0	0	0	0
OTU33	2	0	14	661	46	7	936	354	6	17	17	25	0	483	25	22	3	2	13	14	2744	41	25	154	9	3	119	28	1	238	141	85	10	33	0	414	8	2	29	104	2	0	95	2	2	8	1420	2	0
OTU330	0	0	2	0	0	1	0	0	2	4	0	0	0	0	0	1	0	0	0	0	2	0	1	0	27	2	5	1	0	3	11	3	4	3	0	91	1	0	103	2	157	15	0	15	1	0	3	0	0
OTU332	0	0	0	5	0	0	12	24	0	0	0	0	0	0	0	0	0	0	0	0	0	0	0	0	0	1	0	0	0	0	4	0	0	0	0	0	0	0	0	0	0	0	0	0	0	0	4	0	0
OTU335	0	1	0	0	0	0	0	0	0	0	0	0	35	0	0	0	0	2	0	0	3	0	2	1	70	0	3	0	0	0	7	0	3	0	0	1	6	0	565	0	0	2	0	1	0	0	0	0	0
OTU336	8	0	2	280	28	0	1	1	0	20	46	174	254	0	0	0	0	4	2	0	9	5	41	17	10	54	9	0	0	56	28	26	32	0	0	31	56	0	0	0	8	12	0	12	5	0	0	0	0
OTU338	1	0	2	0	2	0	12	35	0	0	0	0	0	0	1	0	0	0	0	2	3	104	5	0	0	0	0	2	0	0	0	7	0	2	0	0	0	0	0	5	0	0	0	1	0	0	34	1	0
OTU339	2	0	1	63	6	2	7	5	6	0	14	78	0	1	0	1	0	0	0	1	1	15	3	8	3	2	23	54	1	1	1	1	2	28	0	0	0	0	0	99	22	0	1	2	4	0	113	0	0
OTU34	0	0	0	18	3	0	0	0	2	4	0	13	0	0	0	0	0	0	0	0	0	0	0	0	2	0	1	0	1	1	2	0	0	0	6	10	27	10	16	0	6	0	0	17	7	0	0	0	0
OTU341	0	0	0	0	0	0	0	0	0	0	0	0	0	0	0	0	0	0	0	0	0	0	0	0	2	0	0	0	0	0	0	0	0	0	0	0	0	0	0	0	0	0	0	0	0	0	0	0	0
OTU342	1	0	1	68	1	0	0	1	0	22	26	28	20	0	0	0	0	0	0	0	5	0	11	0	55	9	3	0	0	19	0	0	5	0	0	4	6	0	143	0	0	0	0	17	0	0	0	0	0
OTU344	0	0	0	0	1	0	0	0	0	662	0	0	0	0	0	0	0	0	0	0	0	0	1	1	14	0	0	0	0	0	0	3	139	0	0	0	0	0	16	0	0	0	0	0	0	0	0	0	0
OTU345	1	0	0	16	7	1	2	0	1	7	26	10	52	0	0	1	0	1	1	0	3	1	4	0	1	0	2	0	1	0	4	0	7	0	0	3	0	0	217	0	43	3	0	7	5	1	1	0	0
OTU347	0	0	0	0	0	0	0	0	0	0	12	0	0	0	0	0	0	0	1	0	6	0	5	2	23	1	2	0	0	0	3	0	3	0	0	3	6	0	735	0	1	0	0	0	0	0	0	0	0
OTU349	0	0	1	24	10	0	0	0	0	92	2	2	5	0	0	0	0	0	0	0	71	0	4	2	12	0	2	0	0	2	0	0	10	0	0	4	1	0	100	0	1	0	0	0	0	0	0	0	2
OTU3492	0	0	0	63	0	0	0	0	0	0	0	0	0	0	0	0	0	0	0	0	47	627	114	0	0	0	1	0	0	0	0	0	0	0	0	0	0	0	0	0	0	0	0	0	0	0	5	0	0
OTU35	0	0	1	18	0	0	0	0	5	0	0	0	0	1	0	0	0	2	0	0	0	0	0	0	8	0	0	0	0	6	0	0	0	0	15	1	0	5	0	0	1	0	0	0	0	0	0	0	0
OTU353	0	0	0	53	9	0	1	9	0	0	0	0	0	0	0	0	0	0	0	0	178	3	25	0	0	0	0	14	0	32	10	4	0	49	0	0	0	0	0	31	0	0	0	0	0	0	1	0	0
OTU354	0	0	0	0	0	0	0	0	0	0	0	0	0	0	0	0	0	0	0	0	0	0	1	0	4	0	3	0	0	0	0	0	3	0	0	5	6	0	814	0	0	0	0	0	2	0	0	0	0
OTU356	0	0	0	0	0	0	1	0	1	0	0	4	0	0	1	12	0	0	0	1	1	4	3	0	0	0	0	0	0	0	0	0	1	2	0	0	0	0	2	1	24	1	0	0	1	0	123	2	0
OTU358	1	0	0	16	0	1	0	0	0	460	0	0	20	0	0	0	0	1	0	0	4	0	4	0	7	0	0	0	0	0	0	0	73	0	0	0	3	0	27	0	0	0	0	0	0	0	0	0	0
OTU36	11616	10791	13476	399	6	1	3	0	0	462	6	8	2	0	1	0	1	0	187	2	531	0	4	1	8	11	768	1	0	2	3	0	168	0	0	21	0	0	35	0	3	0	1	17	3	1	1	0	0
OTU360	6	1	8	552	65	0	1	2	0	54	73	115	325	0	0	0	0	7	2	0	26	7	66	15	6	74	9	0	0	72	43	26	62	0	0	46	54	0	0	0	13	19	0	18	9	0	0	0	0
OTU365	1	0	1	48	0	0	0	0	0	3	12	32	1	0	0	0	0	1	0	0	0	1	0	3	1	0	0	0	0	2	0	5	3	0	0	2	1	0	6	0	2	1	0	0	0	0	0	0	0
OTU367	0	0	0	1	0	0	32	29	0	0	0	0	0	0	0	0	0	0	55	0	19	0	0	0	0	4	198	0	0	0	0	0	0	0	0	0	0	0	0	0	0	0	0	0	0	0	0	0	0
OTU37	35	2	81	56	133	20	17	136	9	1	0	0	0	81	300	152	82	0	5	149	1205	202	700	300	334	67	81	279	0	439	412	346	9	288	0	249	90	1	1	1054	53	42	25	8	3	126	500	85	113
OTU370	5	0	0	112	8	0	0	0	0	478	7	0	0	0	0	0	0	0	0	0	2	0	1	0	13	0	0	0	0	0	0	0	59	0	0	0	1	0	19	0	0	0	0	1	0	0	0	0	0
OTU377	20	2	14	494	44	0	0	2	0	85	96	107	269	0	0	0	0	5	5	0	58	2	46	26	29	55	11	0	0	90	36	38	89	0	0	43	39	0	83	0	25	32	0	15	9	0	0	0	0
OTU38	0	0	0	0	0	0	0	0	0	72	0	19	0	0	0	0	2	0	0	0	3	0	15	1	0	0	0	0	0	0	0	0	0	0	0	0	0	4	28	0	0	1	0	0	0	1	0	0	0
OTU3822	11	0	0	48	144	3	0	4	8	2	6	0	63	0	0	7	1	605	0	6	13	6	6	7	21	244	1	0	0	19	4	5	39	0	0	50	2	0	120	9	107	47	0	43	41	0	4	0	0
OTU384	3	0	2	0	0	0	0	0	0	9	6	2	15	0	0	0	0	0	0	0	29	1	1	4	62	4	4	0	0	0	14	0	7	0	0	14	1	0	417	0	0	3	0	0	1	0	0	0	0
OTU385	1	0	1	0	0	0	0	0	0	14	19	4	23	0	0	0	0	0	0	0	34	1	10	1	58	2	0	0	0	8	1	4	3	0	1	0	11	0	122	0	0	0	0	13	0	0	0	0	0
OTU386	0	0	0	0	0	0	0	0	0	0	0	0	0	0	0	1	0	0	0	0	0	0	0	0	0	0	0	0	0	0	0	0	0	0	0	0	0	0	0	0	0	0	0	0	0	0	0	0	0
OTU3867	0	0	0	0	0	0	0	0	7	0	115	0	0	0	1	0	0	2	0	0	6	0	0	0	77	0	0	0	0	0	0	11	0	1	2	0	6	2786	0	0	0	1	0	0	0	0	0	0	0
OTU388	0	0	2	213	8	0	0	0	0	0	0	0	0	0	0	0	0	0	0	0	53	22	6	0	0	0	0	0	0	0	0	0	0	0	0	0	0	0	0	0	0	0	0	0	0	1	0	0	0
OTU39	0	1	2	1	30	0	24298	2483	0	5	18	24	16	0	0	0	17	9	0	0	0	1	0	3	4	3	0	363	0	44	42	35	0	397	0	0	0	1	0	579	90	28	0	10	3	0	0	0	0
OTU391	0	0	0	0	0	0	0	0	0	19	14	0	0	0	0	0	0	0	0	0	0	0	0	0	1	0	2	0	0	0	0	1	1	0	0	0	0	0	325	0	0	0	0	0	0	0	0	0	0
OTU392	21	0	11	389	57	0	1	2	0	48	71	220	440	0	0	0	0	4	1	1	42	11	52	27	17	53	8	0	0	65	33	6	64	0	0	25	59	0	35	0	29	11	0	18	14	0	0	0	0
OTU397	2	0	0	64	1	0	0	0	0	13	4	12	17	0	0	0	0	0	0	0	3	0	8	2	0	12	4	0	0	9	4	0	2	0	0	0	3	0	0	0	0	0	0	6	0	0	0	0	0
OTU399	0	0	1	98	3	0	2	23	0	0	0	0	0	0	10	3	1	0	1	3	6	3	2	0	0	0	0	8	0	0	0	0	1	3	0	0	0	0	3	16	144	1	0	1	2	2	103	0	0
OTU4	11194	14480	10341	3670	11219	4	2671	18692	4	128	18531	8051	190	4024	1338	2453	1892	11567	4562	3663	30	2	3	10197	716	675	11005	13052	3	4140	3930	8098	2	12737	0	590	3	8	1	9577	28	19	12166	103	106	1928	19085	2428	4482
OTU40	2	0	1	83	4	0	0	0	0	5	43	1	14	1	0	0	2	0	0	0	6	0	7	0	103	0	0	0	0	3	6	0	0	0	2	0	13	0	14	3	0	1	0	5	0	2	1	0	0
OTU402	7	0	2	46	8	1	0	1	0	58	41	31	209	0	0	0	0	89	2	0	24	1	34	8	19	10	2	0	0	11	0	5	14	0	0	18	10	0	650	0	3	0	0	7	2	0	0	0	0
OTU408	4	0	1	64	1	2	0	0	0	64	0	0	1	0	0	0	0	0	0	0	53	0	1	2	13	10	5	0	0	0	3	0	16	0	0	0	7	0	277	0	0	1	0	0	0	0	0	0	0
OTU41	0	0	1	23	4	1	0	0	0	7	11	4	10	1	0	0	0	0	0	0	12	0	4	6	6	2	0	0	0	0	0	3	3	0	3	2	3	0	45	0	1	1	0	0	0	0	0	0	0
OTU410	0	0	0	0	0	0	0	3	0	0	0	0	0	68	0	0	0	0	0	0	56	64	50	1	0	0	0	0	0	94	37	73	0	0	0	0	0	0	0	14	5	3	22	0	0	0	176	0	0
OTU412	0	0	0	31	1	0	0	0	0	0	0	0	0	0	0	1	1	0	1	1	76	2	0	0	0	0	0	0	0	0	0	5	0	0	0	0	0	0	0	0	0	0	0	0	1	1	62	0	0
OTU416	0	0	0	0	0	0	0	0	0	65	0	0	0	0	0	1	0	0	0	0	0	0	0	0	2	0	0	0	0	0	0	0	3	0	0	0	0	0	0	0	0	0	0	0	0	0	0	0	0
OTU417	4	0	2	215	8	0	0	0	0	14	29	39	137	0	0	0	0	2	0	0	9	2	22	7	1	12	2	0	0	23	22	5	30	0	0	12	6	0	20	0	11	9	0	2	4	0	0	0	0
OTU42	1309	130	1362	542	16	0	8	2	0	1	0	0	0	0	89	288	27	0	310	261	1255	0	0	83	7	1	54	213	0	75	38	3	2	363	1	0	0	0	15	1208	506	6	0	1	0	1	12	5	1
OTU421	9	0	5	412	32	0	4	6	0	40	42	69	385	0	0	0	0	2	2	0	35	7	41	23	15	61	8	0	0	54	18	16	9	1	0	54	47	0	0	0	9	27	0	31	8	0	0	0	0
OTU425	0	0	3	53	17	0	0	8	0	0	0	0	1	0	0	0	0	4	3	0	28	6	6	2	0	0	3	0	0	17	42	30	1	0	0	0	0	0	1	15	13	0	1	0	0	0	346	0	0
OTU428	0	0	0	9	3	0	2	2	1	0	0	0	0	18	1	1	0	0	0	0	1	0	0	4	0	8	16	2	0	11	4	0	0	0	0	0	0	0	0	6	128	0	2	1	0	1	11	0	0
OTU43	1	0	35	2353	2298	0	3	7	1	6	149	2488	0	1678	1	0	2	0	253	0	2193	4009	6997	170	6	9	404	1127	0	5	6	1087	70	1169	0	444	8	0	5	1602	391	857	360	14	7	0	374	0	0
OTU430	0	0	0	0	0	0	59	24	0	0	0	0	0	0	0	0	0	0	0	0	0	0	0	0	0	0	0	0	0	0	1	0	1	0	0	0	0	0	0	0	0	0	0	0	0	0	0	0	0
OTU434	0	0	0	3	0	2	10	12	0	0	0	0	0	0	5	1	0	0	0	1	17	8	0	2	0	0	10	6	0	0	5	10	0	9	0	0	0	0	0	16	13	2	0	0	0	0	58	0	0
OTU437	0	0	2	117	15	0	3	2	0	0	3	0	0	1	4	6	6	0	0	1	56	1	1	1	1	2	2	2	0	1	0	3	0	2	0	0	0	0	0	1	31	2	1	4	9	0	17	1	0
OTU44	0	0	5	0	0	0	2055	2249	0	0	0	6	15	0	2	2	0	7	0	0	0	0	0	66	29	4	3	29	0	29	23	30	0	57	1	0	0	0	6	175	489	264	0	34	35	0	0	0	0
OTU45	0	4	0	0	0	0	0	0	0	0	0	7	0	259	0	0	0	0	104	0	55	0	0	1	0	0	0	0	0	39	55	66	0	0	0	676	27479	0	0	0	0	0	112	0	0	0	0	0	0
OTU4583	3	0	5	156	10	0	0	2	0	15	35	56	107	0	0	0	0	4	1	0	7	0	18	4	9	41	9	0	0	47	13	13	27	0	0	17	8	0	0	0	10	11	0	7	3	0	0	0	0
OTU46	3	0	1	25	3	0	0	0	0	2258	6	3	36	0	0	0	2	2	0	0	11	0	28	1	81	0	1	0	0	6	1	10	449	0	0	11	14	0	44	1	2	0	0	6	1	15	0	0	0
OTU465	0	0	0	48	1	0	0	1	0	0	0	19	27	0	0	0	1	0	0	0	4	0	0	2	3	3	0	0	0	0	1	3	10	0	0	7	1	0	23	0	0	0	0	0	1	0	0	0	0
OTU468	1	0	0	6	0	0	0	0	0	16	13	0	41	0	0	1	0	1	2	0	0	0	0	0	41	2	0	0	0	9	0	1	15	0	0	1	3	0	180	0	0	2	0	0	0	0	0	0	0
OTU47	0	0	0	0	0	0	0	0	0	0	0	2	0	0	2	0	0	0	0	0	0	0	0	0	3	0	0	0	0	0	0	0	0	0	0	0	0	1	0	0	0	0	0	0	0	0	0	0	0
OTU472	15	0	1	180	54	0	0	4	0	12	57	85	483	0	0	0	0	9	0	0	29	13	29	14	7	58	6	0	0	97	30	29	61	0	0	30	42	0	38	0	30	10	0	29	8	0	0	0	0
OTU48	0	1	0	0	0	0	22	31	0	0	0	0	0	0	0	0	3	1	0	0	0	0	0	0	0	0	0	0	0	475	360	213	0	0	0	323	1092	0	0	1	0	0	0	0	0	1	0	0	0
OTU480	0	0	2	87	0	0	0	0	0	2	5	0	27	0	0	0	0	1	0	0	4	0	2	4	0	0	0	0	0	0	0	0	8	0	0	0	0	0	7	0	0	0	0	0	0	0	0	0	0
OTU486	8	0	6	125	16	0	0	2	0	24	50	39	105	0	0	0	0	2	2	0	11	2	14	5	13	36	14	0	0	38	25	4	37	0	0	23	9	1	0	0	9	3	0	6	1	0	0	0	0
OTU49	0	0	1	58	1	0	820	1040	0	2	0	0	8	68	6	1	4	0	0	7	405	9	23	0	0	0	3	1	0	19	32	5	0	1	0	2	0	0	2	11	103	9	21	98	108	2	90	0	0
OTU493	2	0	0	138	10	2	2	0	0	1107	43	36	96	0	0	0	0	1	0	1	27	1	16	3	80	9	3	0	0	14	6	2	188	0	2	18	16	1	403	0	1	1	0	10	1	0	1	0	0
OTU495	1	0	0	0	0	0	0	0	0	0	0	8	0	0	0	0	0	1	0	0	0	1	0	0	2	0	2	0	0	0	1	0	0	0	0	3	2	0	29	0	4	0	0	0	0	0	0	0	0
OTU498	12	0	5	308	20	0	1	5	0	35	56	91	263	0	0	0	0	6	3	0	22	5	39	20	21	45	10	0	0	49	31	10	45	0	0	27	19	0	0	0	16	12	0	20	2	0	0	0	0
OTU5	3051	547	3084	505	1477	8474	424	422	5435	56	32749	7813	7749	466	2	2	2	6	782	3	982	931	899	135	2	127	9577	960	6522	284	677	985	2	976	8922	536	42528	5512	79	1763	5138	457	900	59	26	1	1127	0	0
OTU50	2	0	87	720	2095	0	110	803	2	13	286	106	1	471	0	0	0	1	902	2	4754	683	365	2828	204	94	1769	2263	1	198	621	1599	4	1973	0	1462	6	0	14	1317	75	46	153	1	0	0	16	1	0
OTU504	0	0	0	0	0	0	0	0	0	0	0	0	1	0	0	0	0	0	0	0	0	0	0	0	0	0	0	0	0	0	0	0	0	0	0	0	0	0	0	0	0	0	0	0	0	0	0	0	0
OTU506	17	0	9	348	47	0	2	3	0	71	67	117	268	0	0	0	0	6	2	0	36	5	44	32	26	45	12	0	0	78	55	17	89	0	0	42	53	0	56	0	16	32	0	44	22	0	0	0	0
OTU5063	28	0	14	7	32	0	32	7	0	1	10	55	38	0	0	0	0	33	6	0	1	35	14	15	27	37	96	0	0	40	57	11	8	0	0	0	0	0	1	0	94	141	0	187	264	0	0	0	0
OTU5072	26	9	22	43	82	0	20	53	0	17	50	63	131	0	0	0	0	12	67	0	45	122	57	168	89	120	113	0	0	60	20	12	0	0	0	351	0	0	0	0	13	175	0	7	8	0	6	0	0
OTU51	79	1	1168	480	2706	0	84	647	2	2	185	266	0	245	0	2	5	0	2021	2	946	31	23	1089	210	302	2599	553	1	1981	1116	1064	5	607	1	1174	47	0	18	1666	1375	1645	34	26	3	3	1566	0	1
OTU5189	0	0	0	0	1	0	0	6	0	0	0	0	0	3	0	0	0	0	3	1	0	0	0	0	0	0	0	0	0	0	0	2	3	0	0	0	0	0	0	0	0	0	0	0	0	0	2	0	0
OTU519	4	0	6	178	18	0	0	0	0	21	35	24	177	0	0	0	0	2	1	0	5	0	25	4	6	30	4	0	0	35	9	11	18	0	0	11	9	0	71	0	3	2	0	8	1	0	0	0	0
OTU52	0	0	0	9	0	0	0	0	0	29	0	0	0	0	0	0	0	0	0	0	0	0	0	1	0	4	0	0	0	0	0	0	0	0	0	0	0	0	21	0	0	0	0	0	0	9	0	0	0
OTU524	0	0	0	0	0	0	0	0	0	0	0	0	0	0	0	0	0	0	0	0	0	0	0	0	1	0	0	0	0	0	0	0	0	0	0	0	0	0	0	0	0	0	0	0	0	0	0	0	0
OTU525	2	0	3	43	6	0	1	2	0	9	3	24	297	0	0	0	0	2	0	0	17	1	27	7	2	20	5	0	0	38	10	9	25	0	0	16	27	0	39	0	1	6	0	3	4	0	0	0	0
OTU526	4	0	3	171	18	0	0	1	0	14	27	81	289	0	0	0	0	1	1	0	5	2	12	2	5	25	3	0	0	36	33	10	23	0	0	24	16	0	33	0	11	2	0	12	5	0	0	0	0
OTU528	0	0	0	0	0	0	0	0	1	0	0	0	0	0	0	0	0	0	0	0	288	0	0	9	0	0	30	34	0	1	3	0	0	74	0	0	0	0	0	296	0	0	0	0	0	0	0	0	1
OTU53	0	0	2	50	0	0	0	0	0	454	3	3	0	2	0	0	1	0	0	1	3	0	1	1	20	1	0	0	0	0	0	0	68	0	0	0	0	0	27	0	0	0	0	0	0	4	0	0	0
OTU54	0	0	0	1	0	0	0	0	0	0	0	0	0	0	0	0	0	0	0	0	0	0	0	0	0	0	4	0	0	14	0	0	0	0	0	0	0	0	0	0	2	0	0	0	0	0	0	0	0
OTU5402	0	0	1	14	0	3	0	0	0	0	0	0	0	0	0	0	0	0	0	0	0	0	0	0	0	0	0	0	0	0	0	0	0	0	0	0	0	0	0	0	0	0	0	0	0	0	0	0	0
OTU547	8	0	13	342	45	0	1	1	0	20	58	99	390	0	0	0	0	2	2	0	29	6	61	20	15	34	6	0	0	73	32	25	49	0	0	32	48	0	22	0	16	8	0	21	4	0	0	0	0
OTU5486	40	111	47	3	63	0	0	6	0	0	0	0	0	0	0	0	0	17	60	0	16	7	15	0	8	0	65	0	0	1	1	2	0	0	0	0	0	0	0	0	1	26	0	0	0	0	0	0	0
OTU5498	62	79	66	10	51	0	21	65	0	1	16	17	4	0	0	0	0	62	50	0	9	18	27	52	64	24	35	0	0	14	16	61	2	0	0	15	75	0	1	0	69	16	0	4	0	0	0	0	0
OTU55	1094	1961	1707	1012	1140	0	1428	4709	4	1	652	413	6	968	1	2	1	538	1	0	166	3726	4256	75	20	11	368	337	0	851	771	1179	0	375	2	3	0	1	0	1178	0	0	937	1	0	0	0	0	0
OTU556	1	0	1	115	3	0	0	2	0	7	10	20	119	0	0	0	1	3	0	0	7	3	5	3	8	3	2	0	0	13	6	2	5	0	0	9	2	0	16	0	0	3	0	7	3	0	0	0	0
OTU56	372	1545	279	72	499	1	1925	1821	1	0	87	87	27	54	1	2	2	1828	2	2	80	499	305	287	119	54	138	148	0	12	35	262	4	126	0	0	0	0	3	497	120	29	127	0	0	2	2293	0	0
OTU560	0	0	0	0	2	0	0	0	0	0	0	35	0	0	0	0	0	1	0	0	0	0	0	0	0	11	0	0	0	0	3	0	1	0	0	0	0	0	0	0	0	1	0	0	0	0	0	0	0
OTU567	0	0	0	30	4	0	1	2	0	0	0	0	0	0	0	4	6	0	0	2	4	0	0	0	0	0	17	0	0	0	0	0	1	0	0	1	0	0	0	0	0	0	0	0	0	4	114	1	0
OTU57	0	0	0	0	0	0	0	0	0	2485	4	0	37	0	0	0	2	0	0	0	3	0	50	0	16	2	1	0	3	0	8	1	484	0	0	0	0	0	50	0	2	0	0	0	0	9	0	0	0
OTU5719	455	201	245	4	25	0	492	136	0	0	102	7	19	129	1	0	0	597	4	1	73	116	99	10	1	4	254	1	0	91	5	2	51	6	0	8	246	0	0	16	28	0	156	329	292	0	0	0	0
OTU572	7	0	2	57	20	0	0	1	0	27	42	94	272	0	0	0	0	0	2	0	26	3	38	12	10	59	12	0	0	47	11	8	26	0	0	17	17	0	52	0	1	14	0	14	4	0	0	0	0
OTU5727	95	15	47	8	20	0	9	5	0	1	70	133	50	0	0	0	0	118	8	0	21	20	4	20	3	0	16	0	0	1	12	54	1	0	0	3	0	0	1	0	75	49	0	453	465	0	21	0	0
OTU576	4	0	3	184	25	0	3	3	0	73	42	119	306	0	0	0	0	5	2	0	19	3	39	25	13	46	11	0	0	77	16	22	46	0	0	32	30	0	15	0	20	22	0	21	6	0	1	0	0
OTU578	2	0	2	178	16	0	0	2	0	9	22	79	85	0	0	0	0	4	0	0	21	2	17	11	2	41	2	0	0	10	22	11	7	0	0	8	19	0	0	0	3	12	0	16	0	1	0	0	0
OTU58	37	13	345	0	3	0	0	0	0	0	0	0	1	2	0	0	1	8	188	0	24	15	0	0	0	20	1320	893	0	17	1	1	1	764	0	0	0	0	18	448	0	0	0	1	0	0	0	0	0
OTU59	60	54	199	447	875	0	140	551	1	0	137	157	0	136	1	1	2	0	1410	2	1171	2541	1188	1815	10	10	453	40	0	389	351	385	1	118	0	0	1	0	3	208	172	16	189	0	0	0	19	0	0
OTU6	17813	21218	18966	2017	20092	19	7222	16311	85	129	3249	4430	641	981	20378	19427	19471	16661	11811	20272	3553	5667	7564	10796	11524	6375	9958	12758	24	4669	4258	16001	493	14885	4	4224	16517	8	204	10672	12484	3260	1457	980	539	37947	64	32076	30024
OTU60	23	46	50	20	8	1	418	182	2	2	0	0	0	21	0	2	0	4	0	0	631	174	50	627	486	183	58	7	0	2	14	122	0	39	0	0	0	0	2	136	37	52	8	0	0	0	21	0	0
OTU6085	2	0	0	8	2	0	0	0	0	3114	4	0	0	0	0	0	0	1	0	0	38	0	26	1	22	1	0	0	0	3	0	0	391	0	0	7	1	0	62	0	0	2	0	3	0	0	0	0	0
OTU61	3	0	0	18	7	0	0	0	0	250	6	2	30	0	0	0	0	0	0	0	6	0	0	0	6	5	3	0	2	5	6	0	33	9	0	2	1	0	332	0	0	0	0	24	1	0	0	0	0
OTU6170	0	0	1	55	0	0	0	0	0	0	0	0	0	8	0	0	0	0	230	0	113	0	0	0	0	0	0	0	0	8	2	0	0	0	0	0	0	0	0	0	0	0	0	0	0	0	0	0	0
OTU62	0	0	8	667	90	0	4	13	0	19	84	33	2	1	1	0	2	2	0	1	789	16	33	1	1	2	2	27	0	4	9	48	1	14	0	1494	11	0	98	27	8230	1849	0	7	1	3	4	0	0
OTU626	1	0	2	38	2	1	0	0	1	37	9	5	16	0	12	0	0	3	0	0	6	0	4	1	3	0	0	0	0	52	7	0	16	1	1	4	6	0	0	2	1	0	0	0	0	0	0	0	0
OTU6293	0	0	0	0	0	0	0	1	0	27	0	30	24	0	0	0	0	3	0	0	6	2	0	0	4	0	0	0	0	6	0	0	0	0	0	0	1	0	26	0	3	0	0	0	0	0	0	0	0
OTU63	0	0	2	246	0	0	2	0	0	35	0	0	0	0	0	0	0	0	0	0	13	1	1	0	2	0	0	0	0	0	1	0	0	0	0	89	0	0	0	0	0	0	0	0	0	0	0	0	0
OTU6325	0	0	0	0	0	0	0	0	0	13	0	0	0	0	0	0	0	0	0	0	0	0	0	0	0	0	0	0	1	1	0	0	0	0	0	0	0	0	4	0	0	0	0	0	0	0	0	0	0
OTU6340	49	53	53	13	58	0	16	62	0	0	77	29	2	0	0	0	0	54	21	0	0	0	0	43	0	3	57	0	0	21	16	42	0	0	0	1	0	0	0	0	0	0	0	0	0	0	81	0	0
OTU635	0	0	0	108	0	0	0	0	1	89	28	21	136	0	0	0	0	35	0	0	7	0	0	2	2	0	0	0	0	3	6	3	1	0	0	7	1	0	296	0	1	0	0	3	1	0	0	0	0
OTU64	0	0	0	0	0	0	0	4	0	0	0	0	1	366	0	0	0	0	0	0	9157	126	1851	0	0	0	16	0	0	1	0	0	0	0	0	3	0	0	0	0	0	0	82	0	0	0	304	0	0
OTU6436	14	2	12	6	4	0	1	0	0	1	147	36	26	0	0	0	0	0	3	0	3	11	6	0	0	0	38	0	0	2	6	4	0	0	0	2	210	0	0	0	30	2	0	0	0	0	3	0	0
OTU645	0	1	0	0	0	0	0	0	0	1	0	0	2	0	1	0	0	2	0	0	1	0	0	0	0	1	0	0	0	0	0	1	0	0	0	0	1	0	18	9	0	0	1	0	0	0	0	0	0
OTU65	143	50	196	547	114	1	14357	6415	0	0	0	0	6	512	0	0	0	243	13	0	371	11	10	0	0	0	4	42	0	44	31	10	0	130	0	0	0	0	2	97	173	0	908	261	1019	0	0	0	0
OTU658	1	0	0	0	0	0	0	0	0	0	0	0	0	0	0	0	0	0	0	0	0	0	0	0	1	0	0	0	0	0	0	0	0	0	0	0	0	0	0	0	0	0	0	0	0	0	0	0	0
OTU6585	0	0	0	92	11	0	7	52	0	0	0	0	0	0	0	0	0	0	3	0	7	0	0	0	1	0	2	16	0	1	10	13	0	11	0	0	0	0	67	10	4933	1034	0	3	0	0	2	0	0
OTU66	0	0	0	0	0	0	0	0	0	0	1	0	0	0	12	21	57	0	0	7	302	5329	60	0	4	4	134	472	0	5	0	0	10	132	0	0	0	0	1	1316	0	0	0	0	1	2	0	0	1
OTU6605	27	23	44	4	7	0	6	3	0	3	12	6	0	46	6	12	242	29	8	0	156	26	8	90	0	0	16	4	0	5	18	38	1	5	0	1	0	0	0	5	3	0	15	1	2	307	47	306	441
OTU67	0	0	0	2	0	8	0	0	12	0	0	0	2	0	3	6	3	0	0	2	3	0	6	0	0	0	0	0	0	0	3	3	0	0	2	12	0	3	6	21	1	0	0	2	0	2	0	1	1
OTU68	0	1	0	178	1	0	156	264	0	4	17	88	0	79	1	0	1	1	21	2	60	8	3	46	6	24	1786	24	0	20	80	10	0	18	0	2	0	0	0	107	23	0	5	0	0	4	1379	1	0
OTU6844	14	0	0	0	0	3	1	0	6	0	0	1	2	0	0	0	0	0	0	0	1	0	0	1	1	0	15	5	1	11	13	3	0	11	0	0	0	0	108	48	621	8	0	0	0	0	1	0	0
OTU69	0	0	0	0	2	0	0	1	0	4788	4	5	13	0	0	0	0	0	0	0	4	1	24	0	20	8	0	0	0	0	0	2	571	4	1	0	3	3	31	1	0	0	0	0	2	0	0	0	0
OTU690	0	0	0	0	0	0	0	0	0	0	2	19	17	0	0	0	0	0	0	0	0	0	3	2	1	0	0	0	0	0	0	0	0	0	0	4	0	0	0	0	0	1	0	0	0	0	0	0	0
OTU693	3	0	4	266	4	0	1	2	0	9	19	34	158	0	0	0	0	2	1	0	12	3	0	4	6	28	4	0	0	9	6	6	17	0	0	6	16	0	0	0	8	3	0	3	1	1	0	0	0
OTU7	9155	333	5317	2392	10520	13966	5382	1939	4442	128	3294	18092	8325	8507	331	145	75	8513	2161	216	617	10541	2575	4300	8982	12135	14069	2591	16047	6111	7997	2211	1093	3026	10577	17	7	2436	223	6178	12158	17073	7349	25327	29063	541	0	583	334
OTU70	1	0	0	134	10	0	1	1	0	12294	7	6	0	0	0	0	0	0	0	0	78	0	116	1	43	6	2	0	0	0	2	0	1611	0	0	5	0	0	13	0	0	0	0	0	0	0	0	0	0
OTU700	0	0	0	43	4	0	13	352	1	0	0	0	0	0	1	0	1	0	0	0	1	3	2	1	4	3	0	4	0	0	0	0	0	0	0	96	15	0	0	2	0	1	0	0	0	0	22	3	2
OTU7018	0	0	0	0	6	2	14	12	4	1	0	0	4	0	11	11	4	1	0	9	4	10	2	2	0	1	0	2	0	0	0	2	3	6	0	0	1	0	24	10	19	0	0	3	2	1	267	0	1
OTU71	4	0	309	45	215	1	147	359	0	0	5	18	0	22	0	5	2	16	25	3	69	1	0	26	2	2	384	49	1	60	77	535	4	65	0	0	0	0	0	172	21	0	53	0	0	1	966	2	0
OTU7131	0	0	2	27	0	0	13	6	0	0	4	0	0	0	0	0	0	0	23	0	11	47	0	0	0	0	0	0	0	0	0	3	0	0	0	0	0	0	0	0	0	0	5	0	0	0	3	0	0
OTU7166	0	0	0	0	0	0	0	0	0	0	0	0	0	0	0	0	0	0	0	0	16	0	0	1	0	0	0	0	0	0	0	0	0	0	0	0	0	0	0	0	0	0	0	0	0	0	0	0	0
OTU7169	0	0	0	0	0	0	0	0	0	0	0	0	0	0	0	0	0	0	0	0	24	0	0	1	3	1	0	0	0	0	0	0	0	0	0	0	0	0	0	0	0	0	0	0	0	0	0	0	0
OTU7189	0	0	0	1	0	0	0	0	0	0	0	0	0	1	0	0	0	0	0	0	0	0	0	0	0	0	0	0	1	0	0	0	0	0	0	0	0	0	0	0	0	0	0	0	0	0	0	0	0
OTU72	2	0	1	58	0	0	0	0	0	8549	36	7	0	0	0	0	0	2	0	0	0	0	0	0	0	0	0	0	0	0	0	0	0	0	0	127	0	0	0	0	1	0	0	0	0	0	0	0	0
OTU73	1	0	6	69	2	1	9	2	1	943	20	1	8	3	1	1	0	120	25231	0	2919	11	12	513	1	3	2	4	0	12	0	0	4	3	0	4	7	0	22	9	230	7916	0	11	11	0	10	1	0
OTU74	0	0	0	0	0	1	0	0	0	0	0	0	0	0	0	0	0	2	68	0	24	0	0	0	0	0	0	0	1	0	0	0	0	0	0	0	0	1	0	0	0	0	0	1	0	0	0	0	0
OTU7462	0	0	1	13	3	0	0	0	0	3	6	12	26	0	0	0	0	8	0	0	1	1	7	3	23	8	0	0	0	1	31	11	596	0	0	4	17	0	110	0	5	17	0	1	6	0	1	0	0
OTU7469	1	0	3	289	94	0	0	0	0	5	0	0	0	0	0	0	0	0	19	0	86	80	1889	0	0	1	11	0	0	2	0	1	1100	0	0	0	1	0	11	0	0	0	0	0	0	0	1	0	0
OTU749	4	0	3	166	15	0	0	0	0	10	35	64	90	0	0	0	0	1	2	0	12	4	20	3	4	29	4	0	0	43	15	4	35	0	0	23	16	0	0	0	9	10	0	8	2	0	0	0	0
OTU7493	0	0	0	0	0	0	0	0	0	8	0	0	0	0	0	0	0	0	168	0	27	5	0	0	0	0	0	0	0	0	0	0	0	0	0	0	0	0	0	0	1	20	0	0	3	0	0	0	0
OTU75	1	0	0	0	0	0	0	0	0	0	0	0	0	0	1	0	0	3	0	0	0	0	0	0	0	0	0	0	0	0	0	0	0	0	0	0	0	0	0	1	0	0	0	0	0	0	0	0	0
OTU7556	1	1	1	0	0	0	2	1	0	0	0	0	0	0	2	0	0	1	1	1	0	0	0	0	0	0	0	0	0	0	0	2	0	0	0	39	935	0	1	3	9	1	0	0	0	0	0	0	0
OTU76	73	2	3	219	2	10	1	1	3	2	8	1	2	2	17	34	23	1	0	19	189	20	251	186	79	56	45	0	1	555	505	206	409	0	1	276	103	2	3	210	53	11	0	13	6	5	3	3	5
OTU761	0	0	0	0	0	0	3	1	0	0	0	0	0	4	0	0	0	0	213	0	10	0	1	0	1	0	1	0	0	0	0	0	0	0	0	0	0	0	0	0	5	0	2	0	0	0	6	0	0
OTU77	0	0	55	0	14	2	23	96	0	0	0	0	33	1	0	0	0	0	0	0	5	165	11	4	0	1	0	0	0	16	11	25	0	0	1	0	0	0	0	0	0	0	0	0	0	0	4	0	1
OTU7716	0	0	0	202	231	20	7	32	26	5	0	28	0	8	113	63	70	0	1	49	20	27	15	110	747	498	5	34	1	2	3	3	37	35	1	239	301	4	0	105	242	85	2	0	2	106	270	90	70
OTU7730	47	61	47	9	33	0	18	51	0	0	6	12	1	0	0	0	0	36	36	0	20	25	45	28	34	22	43	0	0	9	3	36	2	0	0	12	53	0	0	0	28	5	0	1	1	0	0	0	0
OTU78	0	0	11	673	436	0	116	28	0	14	432	82	0	17	0	0	0	0	2082	0	3260	73	23	0	0	2	1	1	0	616	461	985	0	2	0	0	0	0	0	33	0	0	42	0	0	0	9	0	0
OTU79	0	0	0	0	0	0	28	3	2	0	0	4	19	0	1	0	0	0	0	0	4	0	0	13	0	0	36	0	0	0	0	0	0	0	0	4	0	0	0	0	0	0	1	0	0	0	1	0	3
OTU8	156	239	174	35	53	3	113	37	3	6	3	37	5	13491	15739	12441	21695	257	228	4567	811	2554	1820	1	0	1	150	1	3	188	51	27	4	5	2	0	1	3	0	5	0	0	14713	0	0	11146	0	17320	11865
OTU80	0	0	0	0	2	0	0	0	0	0	0	3	0	0	0	0	0	0	267	0	0	0	0	0	1	0	0	0	0	1	0	0	0	0	0	0	3	0	10	0	0	0	0	0	0	0	0	0	0
OTU805	6	1	5	328	13	0	1	1	0	30	45	110	133	0	0	0	0	1	0	0	22	5	29	8	4	32	1	0	0	43	35	13	44	0	0	37	21	0	30	0	11	6	0	17	4	0	0	0	0
OTU8086	0	0	0	0	0	0	19	3	0	0	0	0	0	6	0	0	0	0	0	1	0	0	0	2	2	0	21	2	0	0	0	0	0	1	0	0	0	0	0	0	0	0	4	0	0	2	160	0	0
OTU81	677	1085	892	148	65	1	390	1308	1	5	79	86	87	19	0	2	22	5704	313	0	19	120	2	224	40	6	741	53	0	225	334	123	13	59	0	178	0	0	1	295	189	4	125	64	36	8	1	8	4
OTU82	14	0	8	60	8	8	0	0	0	455	19	26	62	0	0	0	0	1	1	0	23	1	17	9	14	3	1	0	0	5	0	4	77	0	0	11	19	2	97	0	3	0	1	0	6	0	0	0	1
OTU8268	42	56	42	10	57	0	14	61	0	0	85	30	1	0	0	0	0	49	23	0	0	0	0	45	0	6	50	0	0	20	13	37	0	0	0	4	0	0	0	0	0	0	0	0	0	0	95	0	0
OTU83	2	0	2	0	1	2306	0	0	1279	7	0	0	7	0	0	0	0	0	0	0	0	0	0	0	2	2	0	1	65	0	21	1	0	8	32	1	0	139	0	5	128	13	0	0	0	0	0	0	0
OTU84	0	0	0	0	1	0	1	0	0	1568	4	0	0	1	0	0	0	0	0	0	4	0	29	0	24	11	0	0	0	0	0	0	310	4	2	0	2	0	12	0	0	0	0	2	0	1	0	0	0
OTU8403	1	0	0	4	0	0	0	0	0	47	0	0	2	0	0	0	0	17	581	0	15	0	0	2	0	0	0	1	0	0	0	0	3	0	0	0	0	0	2	0	24	0	0	0	2	0	1	0	0
OTU846	0	0	0	74	0	0	0	0	1	3	0	0	5	3	0	5	0	507	0	0	0	0	0	2	3	4	6	0	0	0	0	0	2	0	0	4	2	0	0	0	1	2	0	12	5	0	0	0	1
OTU85	0	0	43	2355	1907	2	2	1	0	0	0	0	0	11	0	0	0	0	2	0	1117	0	6	155	4	11	707	2	1	185	269	242	0	4	0	0	0	0	0	5	0	0	0	0	0	0	0	0	0
OTU86	0	0	0	0	0	0	1	0	1	0	0	0	0	125	0	0	0	0	13	0	128	23	18	0	0	0	2	1471	0	3	0	0	1	1178	0	0	0	0	0	236	0	0	38	0	0	0	0	0	0
OTU87	0	0	1	65	4	4	127	46	6	0	4	3	0	0	23	63	166	0	0	42	319	77	11	1	2	3	45	0	0	1	0	14	7	0	0	1	0	0	0	2	7	0	0	0	0	40	209	4	2
OTU8715	2	0	8	481	59	0	0	0	2	0	7	0	0	6	0	0	0	0	119	0	49	0	0	3	1	0	22	1	0	8	29	10	0	3	0	0	0	0	0	4	0	0	3	21	16	0	5	0	0
OTU8740	33	39	43	2	20	0	21	46	0	0	17	8	0	0	0	0	0	21	38	0	27	35	52	11	16	15	66	0	0	5	5	14	1	0	0	1	17	0	0	0	12	3	0	2	0	0	0	0	0
OTU8743	2	0	1	85	12	44	8	3	16	2	116	53	2	1	1	2	1	82	164	1	17	0	1	7	7	2	37	2141	0	9	12	25	8	2692	2	0	0	4	0	1067	8	0	0	83	65	0	5	0	1
OTU88	0	0	4	63	0	2	0	0	2	0	0	0	0	35	0	0	0	33	977	2	200	0	6	81	260	189	5	34	0	9	1	0	5	66	0	333	92	0	0	85	6	0	7	170	207	0	4	0	2
OTU8800	35	11	16	65	108	0	33	35	0	36	72	82	209	0	0	0	0	9	89	0	93	171	71	210	149	153	134	0	0	61	26	17	0	0	0	418	0	0	3	0	8	272	0	1	1	0	0	0	0
OTU8853	0	0	0	0	0	0	752	496	0	0	0	0	0	580	0	0	0	0	1	0	2350	38	87	121	0	0	0	0	0	133	451	438	0	0	0	0	0	0	0	0	10	1	1530	0	0	0	1	0	0
OTU89	0	0	0	0	0	0	0	0	0	25	0	0	0	0	0	0	0	0	0	0	0	0	0	3	2	6	0	0	0	0	0	0	0	0	0	0	0	0	10	0	0	0	0	0	0	0	0	0	0
OTU8945	10	0	7	162	14	0	0	0	0	229	14	4	51	0	0	0	0	3	0	0	77	2	5	1	19	4	2	0	0	9	2	4	25	0	0	1	6	0	60	0	2	0	0	1	0	0	0	0	0
OTU8976	0	0	2	100	0	0	9	12	0	0	0	0	0	0	7	7	7	0	0	5	37	0	3	0	0	0	0	0	0	0	0	0	0	0	0	0	0	0	0	0	0	0	0	0	0	3	174	1	0
OTU9	13	2	1778	567	5449	7	318	947	1	1	1777	2395	0	212	23	146	1	8	1416	13	1187	2781	1234	3309	198	46	1675	7988	2	1566	1777	2809	76	6873	2	785	4	1	88	8588	6422	3794	431	86	43	0	2	1	1
OTU90	4	1	2	51	7	8	23	73	5	0	0	0	0	3	371	498	241	0	0	190	2	38	0	2	3	1	1	5	0	0	2	1	10	3	0	0	0	0	0	7	0	0	0	6	1	138	293	61	20
OTU91	0	0	9	696	3	1	72	13	1	0	0	0	0	0	0	0	0	0	0	0	800	7	12	0	0	5	2	0	0	0	1	0	4	0	1	0	0	1	0	0	0	0	0	2	4	0	0	0	0
OTU9102	11	2	9	2	5	0	1	2	0	0	129	40	25	0	0	0	0	0	6	0	4	4	2	1	0	2	31	0	0	0	1	4	0	0	0	1	174	0	0	0	31	1	0	1	1	0	8	0	0
OTU92	1	0	1	45	0	13	255	141	8	2	0	7	0	0	20	23	18	0	7	16	25	4	10	1	0	1	16	5	0	4	1	0	18	4	3	5	0	0	0	12	5	0	0	8	8	6	2757	3	1
OTU9223	0	0	0	12	0	0	0	0	0	0	0	0	0	0	0	0	0	0	0	0	0	0	0	0	0	0	0	0	0	0	2	0	0	0	0	11	0	0	9	0	688	189	0	1	0	0	0	0	0
OTU9255	12	2	8	19	40	0	12	13	0	12	24	21	52	0	0	0	0	3	38	0	25	54	25	71	49	55	44	0	0	22	8	4	0	0	0	143	0	0	0	0	4	74	0	3	0	0	0	0	0
OTU926	1	0	1	27	3	9	0	0	0	2	0	14	21	0	0	0	0	1	0	0	0	0	1	0	2	0	0	1	0	13	0	4	10	0	0	8	5	0	113	0	0	6	0	1	0	0	0	0	0
OTU9284	69	10	46	18	38	0	4	4	0	0	54	66	31	0	0	0	0	239	20	0	41	47	19	15	2	0	5	0	0	7	48	137	0	0	0	0	0	0	1	7	54	20	0	991	838	0	17	0	0
OTU93	0	0	14	782	1298	0	24	17	0	10	28	148	1	136	0	0	0	2	1253	0	4935	4255	1057	245	72	0	9	52	0	735	1282	1371	0	77	0	127	0	0	10	191	540	310	114	1	0	0	23	0	0
OTU9328	0	0	0	156	0	0	4	7	0	0	0	0	0	0	1	0	0	0	0	0	53	28	5	0	0	1	0	0	0	0	0	0	0	0	0	0	0	0	0	0	0	0	0	0	0	0	25	0	0
OTU9374	15	64	21	1	54	0	0	3	0	0	0	0	0	0	0	0	0	7	40	0	5	3	8	1	4	0	41	0	0	1	0	1	0	0	0	1	0	0	0	0	0	13	0	0	0	0	0	0	0
OTU9395	0	0	10	469	5	0	209	104	0	1	2	3	1	120	5	6	0	0	0	2	59	3	8	0	0	1	1	4	0	3	19	1	27	12	0	2	0	0	0	93	0	0	26	0	1	3	392	3	1
OTU94	0	0	0	0	0	0	12	16	0	0	0	0	0	179	2	16	8	0	0	2	0	0	0	1	6	0	26	95	0	9	16	1	18	70	0	793	709	0	0	178	0	0	27	0	0	11	41	5	7
OTU95	0	0	2	124	0	0	0	0	0	14	1	17	0	0	0	0	0	11	0	0	8	0	7	45	14	16	22	0	0	68	27	4	19	0	0	16	9	0	160	0	26	8	0	33	62	0	0	0	0
OTU952	3	0	2	191	19	0	0	0	0	18	26	83	350	0	0	0	0	0	0	0	20	3	13	6	8	30	3	0	0	36	31	14	25	0	0	28	24	0	0	0	16	3	0	16	2	0	0	0	0
OTU9594	4	0	2	1	0	15	19	3	20	0	2	0	2	1	0	0	1	39	12	0	1	0	0	10	14	7	2	7	1	0	0	0	0	2	1	3	0	0	0	0	9	6	3	9	13	1	0	0	2
OTU96	0	0	4	230	99	2	3	2	0	0	32	124	0	22	2	4	4	0	259	2	24	0	1	26	49	18	14	225	0	17	2	0	11	314	0	0	0	0	0	724	12	0	15	0	1	1	94	1	0
OTU97	2	0	4	139	3	0	0	0	0	20	9	0	221	0	0	0	0	0	0	0	37	0	3	10	150	1	0	0	0	6	8	1	0	0	0	14	17	0	322	5	10	8	0	6	1	0	0	0	0
OTU979	52	2	10	286	28	61	9	2	2570	61	199	132	643	1	0	2	1	462	1	0	51	13	172	53	402	122	2	0	1	10838	45	73	53	5	0	104	62	929	946	13	8	16	0	50	47	0	11	2	7
OTU98	0	0	4	149	12	8	144	167	14	4	7	26	0	0	18	8	7	0	0	7	38	168	10	5	3	1	29	36	0	6	3	2	7	31	0	0	0	0	1	68	40	1	0	6	5	4	3625	0	0
OTU99	4	0	1	60	5	3	0	0	4	15	29	2	80	1	13	5	4	0	0	3	3	3	9	2	2	12	1	0	0	1	2	4	4	1	0	44	8	0	226	4	5	4	0	1	2	3	0	0	0
[truncated: 39 more columns]
